1  
2  
3  
4  
5  
6  
7  
8  
9  
10  
11  
12  
13  
14  
15  
16  
17  
18  
19  
20  
21  
22  
23  
24  
25  
26  
27  
28  
29  
30  
31  
32  
33  
34  
35  
36  
37  
38  
39  
40  
41

## TLR-induced reorganization of the IgM-BCR complex regulates B-1 cell responses to infections

Hannah P. Savage<sup>1, 2</sup>, Kathrin Kläsener<sup>4, 5</sup>, Fauna L. Smith<sup>2, 3</sup>, Zheng Luo<sup>1</sup>, Michael Reth<sup>4, 5</sup>, and Nicole Baumgarth<sup>\*1, 2, 3, 6</sup>

<sup>1</sup> Center for Comparative Medicine, the <sup>2</sup>Graduate Group in Immunology, and the <sup>3</sup>Integrated Pathobiology Graduate Group, University of California, Davis, Davis, CA 95616, USA

<sup>4</sup>BIOSS Centre for Biological Signalling Studies, University of Freiburg, D-79104 Freiburg, Germany

<sup>5</sup>Department of Molecular Immunology, Institute of Biology III at the Faculty of Biology of the University of Freiburg, D-79104, and at the Max Planck Institute of Immunobiology and Epigenetics, D-79108 Freiburg, Germany

<sup>6</sup>Dept. Pathology, Microbiology and Immunology, School of Veterinary Medicine, University of California, Davis, CA 95616, USA

### \*Correspondence:

Nicole Baumgarth, DVM PhD  
Center for Comparative Medicine  
University of California, Davis  
County Rd 98 & Hutchison Drive  
Davis, CA 95616  
USA

nbaumgarth@ucdavis.edu  
phone: 530 – 754 5813  
FAX: 530 – 752 7913

42 **Abstract**

43 Neonatally-developing, self-reactive B-1 cells generate steady levels natural antibodies  
44 throughout life. They can, however, also rapidly respond to infections with increased local  
45 antibody production. The mechanisms regulating these two seemingly very distinct functions are  
46 poorly understood, but have been linked to expression of CD5, an inhibitor of BCR-signaling. Here  
47 we demonstrate that TLR-mediated activation of CD5+ B-1 cells induced the rapid reorganization  
48 of the IgM-BCR complex, leading to the eventual loss of CD5 expression, and a concomitant  
49 increase in BCR-downstream signaling, both *in vitro* and *in vivo* after infections with influenza  
50 virus and *Salmonella typhimurium*. Both, initial CD5 expression and TLR-mediated stimulation,  
51 were required for the differentiation of B-1 cells to IgM-producing plasmablasts after infections.  
52 Thus, TLR-mediated signals support participation of B-1 cells in immune defense via BCR-  
53 complex reorganization.

54

## 55 Introduction

56 During lymphocyte development (self)-antigen binding by the TCR and BCR results in  
57 negative selection, leading to the removal of strongly self-reactive lymphocytes from the T and B  
58 cell repertoire. Depending on the strengths of these antigen-BCR interactions, self-reactive B cells  
59 undergo deletion, receptor-editing, or they become anergic, i.e. unresponsive to antigen-receptor  
60 engagement <sup>1</sup>.

61 Self-reactive, anergic bone marrow-derived B cells up-regulate expression of the signaling  
62 inhibitor CD5 <sup>2</sup>. On developing T cells, the levels of CD5 expression correlate with TCR signaling  
63 intensity encountered during thymic development, with those most strongly binding to self-  
64 antigens expressing the highest levels of CD5 <sup>3,4</sup>. While several ligands have been proposed for  
65 CD5 <sup>3, 5, 6, 7, 8, 9, 10, 11</sup>, none seem to have significant CD5-dependent biological effects. Instead,  
66 CD5 expression seems to directly reduce antigen-receptor signaling <sup>2,3,4,12</sup>. Thus, CD5 seems to  
67 act primarily as a component of the antigen-receptor complex, directly modulating TCR and BCR  
68 signaling.

69 In addition to anergic B cells, most B-1 cells also express CD5. In contrast to lymphocytes  
70 developing postnatal, these primarily fetal and neonatal-derived B cells <sup>13, 14, 15</sup> seem to undergo  
71 a positive selection step during development, requiring self-antigen recognition and strong BCR  
72 signaling. The lack of self-antigen expression, or the deletion of co-stimulatory molecules that  
73 enhance BCR signaling, diminished B-1 cell development, while deletion of negative co-  
74 stimulatory signals, or enhanced surface expression of the BCR, resulted in enhanced  
75 development <sup>5, 15, 16, 17, 18</sup>. Specificity of CD5+ B-1 cells for self-antigens and self-antigen binding  
76 during development is consistent with their known self-reactive BCR repertoire <sup>19, 20, 21, 22</sup> and thus  
77 a role for CD5 in silencing B-1 cell responses to BCR-engagement in order to avert autoimmune  
78 responses.

79 Yet, not all B-1 cells express CD5. Depending on their expression or not of CD5, they are  
80 typically divided into two subsets, B-1a and B-1b, respectively. Consistent with their expression  
81 of CD5, B-1a cells do not proliferate in response to BCR stimulation <sup>23</sup>. However, in CD5<sup>-/-</sup> mice

82 and in mice in which the association of membrane IgM with CD5 was inhibited, mature B-1 cells  
83 demonstrated a proliferative response similar to that of conventional B (B-2) cells<sup>24, 25</sup>, further  
84 confirming that CD5 expression reduces B-1 cell responsiveness to BCR-signaling.

85 A BCR-signaling independent response of B-1 cells might be inferred from the fact that B-1  
86 cells strongly respond to innate, TLR-mediated signals, such as LPS, and that they are a major  
87 source for “natural” self-reactive IgM. Moreover, steady-state secretion of natural IgM does not  
88 appear to require external antigenic stimulation, as total serum levels of natural IgM and  
89 frequencies of IgM-secreting B-1 cells are similar in mice held under both, SPF and germfree  
90 housing conditions<sup>26, 27</sup>. However, natural IgM production is not stochastic, but instead likely  
91 driven by expression of self-antigens. This was demonstrated by Hayakawa et al, who showed a  
92 lack of anti-Thy-1 self-reactive IgM antibodies in the serum of Thy-1-deficient but not Thy-1  
93 expressing mice<sup>19, 28</sup>, as well as repertoire studies by Yang et al, which showed selective and  
94 extensive clonal expansion of certain CD5+ B-1 cell clones during the first 6 months of life,  
95 including in germfree mice<sup>22</sup>.

96 Furthermore, B-1 cells can be actively involved in immune responses to various pathogens<sup>29</sup>,  
97<sup>30, 31, 32, 33</sup>. Given that CD5 is a BCR inhibitor, it was suggested that CD5- B-1b cells, but not B-1a  
98 cells, respond to pathogen encounters in an antigen-dependent manner. Haas and colleagues,  
99 conducting studies in CD19-deficient mice that lack B-1a development, concluded that B-1a cells  
100 are responsible for natural IgM secretion, while only the B-1b cells responded to *Streptococcus*  
101 *pneumonia* infection<sup>29</sup>. Similarly, CD5- B-1b cells were shown to expand and secrete protective  
102 IgM after infection with *Borrelia hermsii* and *Salmonella typhimurium*<sup>30, 31, 32</sup>.

103 This model of a “division of labor” between B-1a and B-1b cells leaves the B-1 cell response  
104 to influenza infection as an outlier. Chimeric mice reconstituted with either allotypically-marked  
105 CD5+ or CD5- B-1 cells showed that only CD5+ B-1 cells were responding *in vivo* to influenza  
106 infection with migration from the pleural cavity to the draining mediastinal lymph nodes (MedLN),  
107 where they differentiated into IgM-secreting cells<sup>33, 34</sup>. The reasons for the apparent different  
108 behaviors of CD5+ and CD5- B-1 cells in the various infectious disease models are unexplained.

109 Furthermore, it is unclear how B-1 cells expressing CD5 can participate in antigen-specific  
110 immune responses.

111 This study addresses some of these questions and reconciles previous divergent findings on  
112 B-1 cell responses to infections by demonstrating that CD5+ B-1 cells are the responding B-1 cell  
113 population to infection with both, influenza virus as well as *Salmonella*. However, once activated,  
114 these B-1 cells lose expression of CD5 and thus become “B-1b” like. Mechanistically,  
115 downregulation of CD5 required expression of TLR, triggering of which resulted in the  
116 reorganization of the IgM-BCR complex. TLR-mediated reorganization led to a rapid dissociation,  
117 and eventual loss of CD5 from the complex, and triggered enhanced IgM-CD19 and CD79:Syk  
118 interactions, and thus activation of downstream BCR-signaling pathways. Thus, TLR-mediated  
119 signals support participation of B-1 cells in immune defense via BCR-complex reorganization,  
120 linking innate and adaptive antigen-recognition by B-1 cells.

121

## 122 **Results**

### 123 *CD5 negative B-1 cells are responsible for local IgM secretion after influenza infection*

124 We previously identified three populations of cells involved in natural IgM secretion: CD5+  
125 B-1 cells, CD5- B-1 cells, and plasma cells, the latter are CD19- and CD138/Blimp-1+ <sup>35</sup>. Using a  
126 neonatal chimera model, in which the B-1 cells of neonatal mice are replaced by allotype-  
127 disparate peritoneal cavity B-1 cells <sup>36</sup>, we demonstrated that the natural IgM-secreting plasma  
128 cells are B-1-derived (B-1PC) <sup>35</sup>. Because B-1-derived IgM is important for protection from lethal  
129 influenza infection <sup>37</sup>, we sought to determine which B-1 cell populations generate IgM in the  
130 draining (mediastinal) lymph nodes (MedLN) after influenza infection <sup>33</sup>.

131 MedLN of allotype-chimeras infected for 7 days with infection with influenza A Puerto Rico  
132 8/34 (A/PR8) showed a rapid accumulation and then differentiation of B-1 cells to IgM-secreting  
133 B-1PC (Fig. 1A). Chimeras generated with B-1 donor cells from Blimp-1 YFP reporter mice <sup>38, 39</sup>  
134 confirmed the presence of Blimp-1-YFP+ B-1PC in the MedLN (Fig. 1B). The MedLN B-1PC  
135 mostly lacked expression of CD5, particularly among the Blimp-1<sup>hi</sup> cells (Fig. 1C). This was

136 surprising, as we had shown previously B-1 cell migration from the pleural cavity to the MedLN  
137 and their local IgM secretion was restricted to CD5<sup>+</sup> but not CD5<sup>-</sup> CD19<sup>+</sup> CD43<sup>+</sup> B-1 cells after  
138 influenza infection<sup>34</sup>.

139 To investigate the contribution of CD5<sup>-</sup> B cells to local IgM secretion, we FACS-sorted  
140 CD19<sup>+</sup>IgM<sup>+</sup>IgD<sup>lo</sup>CD43<sup>+</sup> CD5<sup>+</sup> and CD5<sup>-</sup> B cells on days 3, 5, and 7 after influenza infection from  
141 C57BL/6 mice (Fig. 1D), which were then cultured for 2 days to analyze spontaneous IgM  
142 secretion by ELISA. Consistent with the presence of CD5<sup>-</sup> B-1PC, cells lacking CD5 secreted  
143 more IgM compared to CD5<sup>+</sup> cells when measuring total IgM concentrations and calculating IgM  
144 production per cell (Fig 1E). Sorted CD5<sup>+</sup> cells did not secrete measurable amounts of IgM unless  
145 harvested after day 5 of infection.

146 Because CD5<sup>-</sup> B-1 cells and IgM-secreting B-2 derived plasmablasts express a similar  
147 phenotype (IgM<sup>+</sup> IgD<sup>-</sup> CD5<sup>-</sup> CD19<sup>+</sup> CD43<sup>+</sup>), the CD5<sup>-</sup> cells could have contained both B-1 cells  
148 and/or B-2-derived IgM-secreting cells. To determine the contribution of CD5<sup>-</sup> B-1 cells to IgM  
149 secretion in the MedLN, we infected allotype-chimeras, in which B-1 (Igh<sup>a</sup>) and B-2 (Igh<sup>b</sup>) cells  
150 and their secreted antibodies were distinguished based on Igh-allotype differences<sup>36</sup>. The studies  
151 confirmed our previous findings that among CD19<sup>hi</sup>IgM<sup>b</sup>+IgD<sup>lo</sup>CD43<sup>+</sup> B-1 cells in the MedLN,  
152 about 70% expressed CD5 after influenza infection (Fig. 1F-G).

153 Because we had shown previously that Blimp-1<sup>+</sup> B-1PC have reduced or absent CD19-  
154 expression<sup>35</sup> and found here that these cells are present after influenza infection (Fig. 1A-B) and  
155 often lacked CD5-expression (Fig. 1C), we expanded the analysis to include all IgM<sup>b</sup>-expressing  
156 (B-1 donor-derived) and IgM<sup>a</sup> negative (recipient-derived) cells, regardless of expression of CD19  
157 or other surface markers. In contrast to the analysis described above, this expanded analysis of  
158 all B-1 donor Igh-b cells revealed that the frequency of CD5 negative MedLN B-1 cells increased  
159 after influenza infection (Fig. 1H), consistent with the development of CD5<sup>-</sup> B-1PC in this  
160 compartment (Fig. 1A-C). Furthermore, FACS-sorting and culture of CD5<sup>+</sup> and CD5<sup>-</sup> B-1 cells  
161 showed that a higher frequency and total number of CD5<sup>-</sup> B-1 cells secreted IgM in the MedLN

162 compared to CD5+ B-1 cells on days 3, 5, and 7 after infection (Fig. 1I). Thus, CD5- B-1 cells  
163 increase in the MedLN and are a major source of local IgM production after influenza infection.

164

165 *CD5+ B-1 cells decrease CD5 expression after LPS stimulation in vitro*

166 To reconcile our previous findings about the role of CD5+ B-1 cells in influenza infection  
167 <sup>33, 34</sup>, we considered whether CD5 surface expression changes after B-1 cell activation. Indeed,  
168 approximately 40% of highly purified FACS-sorted CD5+ B-1 cells from the peritoneal cavity  
169 lacked CD5 expression when cultured for 3 days in the presence but not absence of LPS, a stimuli  
170 that is known to induce IgM production by body cavity B-1 cells <sup>40</sup> (Fig. 2A). CD5 surface  
171 expression was unaffected during the first 2 cell divisions following stimulation, but was then  
172 quickly lost during the next 1-2 divisions (Fig. 2B). Both, surface-expressed CD5 and *cd5* mRNA,  
173 as assessed by qRT-PCR, were decreased among B-1 cells after 3 days of LPS stimulation (Fig.  
174 2C-D). Surface CD5 levels were decreased first, by 1.5 days of culture, while *cd5* mRNA was not  
175 reduced until 2 days after culture onset (Fig. 2C-D). The stimulated cells began secreting IgM  
176 before CD5 levels were reduced, but the increase in IgM secretion was more pronounced after at  
177 least 2 days of stimulation compared to the earlier time points (Fig. 2E).

178 A number of control studies ensured that the reduced frequencies of CD5+ B-1 cells in the  
179 cultures were due to a loss of surface expression and not to an expansion of small numbers (<  
180 5%) CD5- cells that might have contaminated the cultures at onset. First, we separated by FACS  
181 CD5+ and CD5- B-1 cells from the body cavities to very high purities, and then cultured either  
182 100%, 99% or 95% sorted CD5+ cells to which we added 0%, 1% and 5% CD5- cells, respectively.  
183 The percentage of CD5+ and CD5- cells after 3 days of culture was unaffected by the initial  
184 composition of the culture wells (Fig. 2F). When cultures with 100% and 95% CD5+ at onset were  
185 compared on day 3 of culture, there was no significant difference in either CD5 MFI or in the  
186 percent of CD5+ and CD5- cells (Fig. 2G). Thus, small percentages of CD5- B-1 cells at culture  
187 onset, representative of potential sort impurities, could not explain the lack of CD5 expression by  
188 the CD5+ B-1 cells stimulated with LPS for 3 days.

189           Next, we compared the ability of CD5+ and CD5- B-1 cells to survive and/or proliferate  
190 with and without LPS stimulation. To ensure that the two populations were exposed to the same  
191 culture conditions, CD5+ and CD5- B-1 cells were sorted, labeled with different proliferation dyes,  
192 and cultured together (Fig. 2H). Compared to B-1 cells that expressed CD5 on day 0, CD5- cells  
193 survived less well after stimulation (Fig. 2I). B-1 cells expressing or not expressing CD5 at culture  
194 onset responded similarly with proliferation to LPS stimulation in terms of the percentage of cells  
195 that underwent division as well as the numbers of divisions each B-1 cell underwent (Fig. 3J-K).  
196 Reflecting the similar rates of proliferation and the increased survival of the CD5+ B-1 cells,  
197 populations of B-1 cells that expressed CD5 at culture onset were present at higher frequencies  
198 of input cells compared to B-1 cells that were CD5 negative (Fig. 2L). Thus, we conclude that  
199 CD5+ B-1 cells lose CD5 surface and mRNA expression after *in vitro* LPS stimulation.

200

201 *B-1a cells differentiate into CD5- IgM secreting cells after stimulation with multiple TLR agonists*

202           Endosomal TLR agonists Imiquimod (TLR7) and ODN CpG 7909 (TLR9) also induced  
203 CD5 downregulation on B-1a cells after 3 days of culture (Fig. 3A) as did stimulation with lipids  
204 from *Mycobacterium tuberculosis* (Mtb lipids) (Fig. 3C). Similar to LPS stimulation, CD5  
205 expression decreased as the cells divided (Fig. 3B). In contrast, stimulation of CD5+ B-1 cells  
206 isolated from mice lacking all TLR-signaling due to a deletion in Unc93, TLR2 and TLR4 (kind gift  
207 of Greg Barton, UC Berkeley), were unable to respond with proliferation (Fig. 3D), and failed to  
208 lose CD5 (not shown). Thus, B-1 cells were stimulated via TLR-engagement and not via the  
209 BCR. In all instances, the loss of CD5 was correlated with the differentiation of CD5+ B-1 cells to  
210 IgM-secreting cells, as stimulation of these cells with Imiquimod, CpG 797 and LPS for 3 days  
211 resulted in increased percentages of CD138+ cells (Fig. 3E-F) and an increase in IgM  
212 concentrations in the culture supernatants (Fig. 3G).

213           Finally, we examined whether phosphatidylcholine (PTC)-binding B-1 cells can lose CD5  
214 surface expression after TLR-stimulation. PTC is a well-known specificity of a large subset of  
215 peritoneal cavity CD5+ B-1 cells<sup>21, 41</sup>. PTC-binding B-1 cells, identified by incubation of cells with



216 a fluorescent PTC-liposome (kind gift of A. Kantor, Stanford University), lost CD5 expression  
217 similarly to PTC non-binders (Fig. 3H). We conclude that TLR-mediated stimulation of CD5+ B-1  
218 cells (“B-1a”) causes the loss of CD5 surface expression, making these cells phenotypically  
219 indistinguishable from the proposed B-1 cell “sister” population, the CD5- “B-1b” cells.

220

221 *CD5+ B-1 cells become CD5- IgM ASC in the MedLN after Influenza infection*

222 These results raised the possibility that pleural cavity CD5+ B-1 cells respond to influenza  
223 virus infection with proliferation, down-regulation of CD5 and differentiating into IgM-secreting  
224 cells in the MedLN, explaining the increases in CD5- B-1 cells in the MedLN after influenza  
225 infection (Fig. 1), despite their inability to enter these lymph nodes<sup>33,34</sup>.

226 To test this hypothesis, neonatal B-1 cell chimeras generated with FACS-purified CD5+  
227 and CD5- B-1 cells (Igh<sup>b</sup>) at different ratios were infected with influenza virus for 7 days and  
228 analyzed for the presence of CD5+ and CD5- MedLN B-1 cells and their ability to secrete IgM  
229 (Fig. 4A). As shown previously<sup>33</sup>, MedLN of mice reconstituted with CD5- B-1 cells had reduced  
230 MedLN B-1 cell after infection (Fig. 4B) The frequency of CD5+ and CD5- cells among total donor  
231 B-1 cells in the MedLN was similar, regardless of the initial percentage of CD5+ cells (Fig. 4C-D).  
232 Of particular note, in chimeras generated with only CD5+ B-1, >50% of B-1 cells in the MedLN  
233 lacked CD5 expression (Fig. 4D).

234 Allotype-specific ELISPOTs showed that chimeric mice generated with only CD5+ B-1  
235 cells formed significantly higher frequencies of B-1-derived IgM-secreting cells compared to  
236 chimeric mice generated with predominantly CD5- B-1 cells (Fig. 4E). In fact, chimeras generated  
237 with CD5- B-1 cells showed no more B-1 derived IgM ASC in their MedLN than uninfected  
238 chimeras, consistent with their deficiency in entering the MedLN after infection (Fig. 4E, left  
239 panel). There was a significant positive correlation between the frequencies of CD5+ B-1 cells  
240 transferred to generate the neonatal chimeras and the ability of the mice to generate IgM ASC  
241 following influenza virus infection (Fig. 4E, right panel).

242 CD5+ B-1 cells failed to show signs of clonal expansion following their accumulation in the  
243 MedLN<sup>33</sup>, which was confirmed using BrdU injection on day 6 after infection. However, the CD5-  
244 MedLN B-1 cells showed increased proliferation compared to their counterparts in body cavities  
245 (Fig. 4F). Among B-1 cells the proliferation rate was highest among the CD138+ B-1PC, with rates  
246 similar to that of the B-2 CD138+ plasma cell compartment (Fig. 4F). The data support the  
247 hypothesis that CD5- B-1 and B-1PC arise from proliferating CD5+ pleural cavity B-1 cells that  
248 accumulate in the MedLN and differentiate into CD5- IgM ASC following influenza virus infection.

249

250 *CD5+ B-1 cells become CD5- IgM ASC in the Mesenteric LNs and Peyer's Patches after*  
251 *Salmonella typhimurium infection*

252 Numerous infection models have reported CD5- “B-1b” cell responses after infection,  
253 including studies on mice infected with *Streptococcus pneumoniae*<sup>29</sup> and *Salmonella typhimurium*  
254<sup>32</sup>. This has led to the concept that the CD5- B-1b are a “responder” B-1 cell population, whereas  
255 CD5+ B-1 cells generate natural IgM exclusively in the steady state<sup>29, 42</sup>. We therefore aimed to  
256 reexamine whether activation and differentiation of CD5+ B-1 cells into CD5- IgM ASC were more  
257 universal outcomes of CD5+ B-1 cell activation to infections.

258 Neonatal chimeric mice generated with varying ratios of FACS-purified CD5+ and/or CD5-  
259 B-1 cells, as described above were orally infected with *Salmonella typhimurium* (Fig. 5A). Again  
260 we found a similar percentage of CD5+ and CD5- B-1 cells (identified as IgM<sup>b</sup>+IgM<sup>a</sup>-) in the  
261 Mesenteric LN and Peyer's Patches on day 4 after infection, regardless of the initial percentage  
262 of CD5+ cells used to reconstitute the B-1 compartment of these mice (Fig. 5B-C). Over 50% of  
263 the B-1 cells in tissues of chimeras established with only CD5+ B-1 cells lacked CD5 surface  
264 expression (Fig. 5B-C) and these chimeras were the most competent at forming IgM secreting  
265 cells after infection (Fig. 5D-E). In contrast, the MesLN and PP of chimeric mice that were given  
266 primarily B-1b cells formed fewer IgM secreting cells, although more than the uninfected chimeras  
267 (Fig. 5D-E).

268           The *S. typhimurium* surface antigen OmpD had been reported previously to stimulate IgM  
269 secretion exclusively by CD5- “B-1b” cells <sup>32</sup>. However, in our hands, although total B-1-derived  
270 IgM was increased after infection in the Mesenteric LN (Fig. 5D), OmpD-specific B-1-derived IgM  
271 ASC did not increase significantly (Fig. 5F). Instead, we found OmpD-specific IgM secretion by  
272 B-2 derived plasmablasts. Of note, the phenotype of B-2-derived plasmablasts is indistinguishable  
273 from that of “B-1b” cells (CD19<sup>low</sup> CD45<sup>lo</sup> IgM<sup>+</sup> CD43<sup>+</sup> (Fig. 5F)), and thus only identifiable using  
274 a lineage-marking approach, such as used here.

275           Together these findings demonstrate that in response to both bacterial and viral infections,  
276 B-1 cells accumulating in secondary lymphoid tissues lose CD5 expression and become the main  
277 source of B-1 derived IgM secretion after both bacterial and viral infections. *In vitro* this process  
278 was recapitulated by stimulation with various TLR-ligands.

279

#### 280 *Changes in BCR signaling following innate activation of B-1 cells*

281 Surface CD5 expression by B-1 cells has been linked previously to their inability to proliferate in  
282 response to BCR-mediated signaling <sup>25</sup>. To analyze the association of CD5 with the BCR on B-1  
283 cells in steady state and to determine what alterations stimulation of the BCR may induce on B-1  
284 cells, we analyzed the IgM-BCR-complexes on the cell surface of highly FACS-purified, then  
285 rested, peritoneal cavity CD5<sup>+</sup> CD45<sup>R<sup>lo</sup></sup> CD23<sup>-</sup> B-1 and splenic CD45<sup>R<sup>hi</sup></sup> CD23<sup>+</sup> CD5<sup>-</sup> follicular B  
286 cells using Proximal Ligation Assay (PLA). Both CD19 and CD5, were strongly associated with  
287 the surface-expressed IgM-BCR on B-1 cells, while CD5 was not directly associated with the co-  
288 stimulator and signaling molecule CD19 (Fig. 6A). Consistent with the lack of stimulation and  
289 strong interaction between IgM and CD5, the BCR-signaling chain CD79 only weakly interacted  
290 with the adaptor molecule Syk in B-1 cells in the steady-state. B-2 cells lack CD5 expression, and  
291 CD19 did not interact with the IgM-BCR prior to stimulation (Fig. 6A).

292           As expected, stimulation of CD5<sup>+</sup> B-1 cells with anti-IgM failed to induce their proliferation  
293 but did induce proliferation of B-2 cells. In contrast, stimulation with CpG (TLR9-ligands) induced  
294 strong proliferation by both B-1 and B-2 cells (Fig. 6B). The lack of responsiveness to BCR-

295 stimulation was explained by the PLA data, which showed the maintenance and even increase in  
296 IgM-BCR:CD5 association and an increase in the association of the inhibitor CD5 with CD19  
297 following anti-IgM treatment. Furthermore, B-1 cells lost the interaction of the IgM-BCR with  
298 CD19. Consequently, CD79-Syk interaction remained very low (Fig. 6C). Thus, BCR-engagement  
299 on B-1 cells inhibits BCR-signaling by reducing steady-state IgM-CD19 interactions and likely also  
300 by initiating instead interactions between CD5 and CD19.

301 In contrast to direct stimulation of the IgM-BCR, CpG stimulation led to changes in the  
302 BCR-signaling complex that are consistent with induction of positive BCR-signaling, and/or the  
303 ability to signal through the antigen-receptor. CpG stimulation strongly increased the interaction  
304 of IgM-BCR:CD19 and reduced CD5:IgM-BCR proximity. The already weak CD5:CD19  
305 interaction was further reduced (Fig. 7A), consistent with the loss in surface CD5 expression noted  
306 following stimulation (Fig 3). These rapid changes in the BCR-signaling complex were associated  
307 with increases in CD79:Syk interaction, suggesting active BCR downstream signaling in CpG-  
308 stimulated B-1 cells. This was further supported by sustained increased levels of phosphorylated  
309 Akt (pAkt; pS473), while anti-IgM stimulation reduced pAkt levels below that of unstimulated B-1  
310 cells by 24h, after an initial increase (Fig. 7B).

311 We also noted increased Nur77 expression in CpG- but not anti-IgM-stimulated B-1 cells  
312 at 24h (Fig. 7C) but not at 3h (not shown). Given that B-1 cell responses following CpG-stimulation  
313 were TLR-expression dependent *in vitro* (Fig. 3D), and no external antigen was provided to the  
314 cultures, TLR-signaling may directly link to BCR-signaling, or TLR-signaling may “license”  
315 subsequent self-antigen recognition, by altering the BCR-signaling complex. In support of the  
316 latter, we noted a strong increase in the frequencies of PTC-binding B-1 cells during culture (Fig.  
317 7D), which may be due to the expansion of CpG-activated B-1 cell in response to PTC-antigen  
318 present on dead and dying cells in the cultures.

319

320 *Local IgM production following influenza infection depends on TLR expression*

321 TLR-expression was also required for B-1 cell responses to influenza virus infection in vivo, as  
322 complete TLR-/- mice (due to a lack of TLR2, TLR4 and Unc93) showed significant deficits in  
323 CD5+ B-1 cell responses following infection (Fig. 8A/B), resulting in a significant increase in the  
324 ratio of CD5+ over CD5- and CD19+ CD43+ B cells. This suggested that CD5+ B-1 cells in TLR-  
325 /- mice could enter the MedLN, consistent with our previous findings that this step is TLR-  
326 independent but Type I IFN-dependent<sup>34</sup>, but once in the MedLN were not activated via TLR-  
327 dependent signals to downregulate CD5 (Fig. 8B). Of importance, the lack of TLR-stimulation  
328 also resulted in a near complete loss of CD19<sup>lo/-</sup> IgM+ CD138+ B-1PC in the MedLN at day 5 of  
329 infection (Fig. 8C), and a corresponding drop in IgM ASC in TLR-/- compared to control mice at  
330 that timepoint (Fig. 8D), while viral loads were similarly low in the lungs of both mouse strains (not  
331 shown). Generation of Ig-allotype chimeras in which only B-1 cells lacked TLR expression  
332 confirmed a B-1 cell-intrinsic requirement for TLR-signaling in B-1 cell differentiation to CD138+  
333 ASC after influenza virus infection (Fig. 8D-F).

334 Together the data demonstrate a linkage of TLR and BCR-signaling during B-1 cell  
335 responses to infections, with intrinsic TLR-mediated signaling triggering a rapid reorganization of  
336 the IgM-BCR-signalosome complex including the removal of the BCR-signaling inhibitor CD5 and  
337 the increased association of IgM-BCR with the co-receptor CD19, resulting in the differentiation  
338 of CD5+ B-1 to CD5- IgM-secreting B-1 and B-1PC.

339

## 340 **Discussion**

341 Self-reactive, fetal and neonatal-developing B-1 cells are not activated readily in response  
342 to BCR-stimulation, owing to an unresponsive IgM-BCR complex, previously shown to be due to  
343 expression of the BCR-signaling inhibitor CD5 and a lack of fully functional CD19 signaling. Yet  
344 B-1 cells respond rapidly to various infections with migration to secondary lymphoid tissues and  
345 differentiation into IgM secreting cells. The present study suggests a mechanism by which B-1  
346 cell can overcome their inherent BCR-signaling block, namely via TLR-mediated reorganization  
347 of the BCR-signalosome complex. This non-redundant signal was shown to cause the loss of

348 CD5 association with the IgM-BCR and eventually CD5 expression itself, the increased  
349 association between IgM and the co-stimulatory molecule CD19, and a resulting strong increase  
350 in CD79:Syk interaction and phosphorylation of BCR downstream effectors.

351 Thus, TLR-signaling might not simply only activate B-1 cells innately, but may also activate  
352 or “license” B-1 cells for subsequent BCR-mediated signaling. This could explain the recent data  
353 by Kreuk and colleagues, which associated specific TLR-signaling of B-1 cells with antigen-  
354 specific B-1 cell responses. Most notable was the early loss of CD5:BCR association and eventual  
355 loss of expression of CD5 on TLR-activated CD5+ “B-1a” cells *in vitro*, and *in vivo* in response to  
356 both bacterial (*S. typhimurium*) and viral (influenza virus) infections. The exclusion/removal of  
357 the signaling inhibitor CD5 correlated with enhanced CD79:syk interaction, enhanced pAkt levels  
358 and the differentiation of B-1 cells. In contrast, IgM-BCR stimulation of CD5+ B-1 cells alone  
359 enhanced CD5:BCR interactions and reduced BCR:CD19 interactions, resulting in a failure to  
360 induce CD79:syk association and sustained phosphorylation of Akt. We conclude that BCR-  
361 downstream signaling pathway activation is disabled in self-reactive, CD5+ B-1 cells and that this  
362 can be overcome with TLR-mediated activation.

363 As we showed that it is the CD5+ B-1 cell population that initially responded to infections  
364 with influenza virus and with *S. typhimurium*, the latter previously identified as an exclusive “B-  
365 1b” response<sup>32, 43</sup>, it appears likely that other pathogen-induced B-1 cell responses may also  
366 represent responses of CD5+ B-1 cells<sup>29, 30, 31, 32, 43</sup> which subsequently lose CD5, rather than de  
367 novo responses of CD5- “B-1b” cells. If true, the lack of CD5-expression on B-1 cells would mark  
368 previously activated and differentiated B-1 cells. This is consistent with previous reports on the  
369 phenotype of natural IgM-secreting cells<sup>35, 44</sup> and could explain also earlier reports that CD5+,  
370 not CD5-, B-1 cells form natural IgM secreting cells<sup>29, 45, 46</sup>. In addition, the data are consistent  
371 with findings that CD5- B-1 cells contain CD5- memory-like B-1 cells in the body cavities of  
372 previously infected mice<sup>31, 47</sup>.

373 The data presented here are inconsistent with models that regard B-1 cell responses as  
374 a “division of labor” between two subsets of B-1 cells: B-1a and B-1b cells, where CD5+ B-1a

375 contribute “natural” IgM and CD5- B-1b the induced IgM, proposed previously<sup>29, 42</sup>. Instead, we  
376 show that the CD5- B-1 cells secreting IgM in response to influenza or *Salmonella spp.* were both  
377 derived from TLR-activated CD5+ B-1 cells. Since no other clearly subset-defining differences  
378 between B-1a and B-1b cells have been reported to-date, it may be more prudent to describe B-  
379 1 cells simply as CD5+ and CD5- and to drop the use of the terms B-1a and B-1b, unless and  
380 until further clear subset-defining differences are identified.

381 Our data do not exclude the possibility that some B-1 cells develop which either express  
382 low, or undetectable levels of surface CD5, as described previously<sup>48</sup>. Given the known functions  
383 of CD5 as an inhibitor of BCR-signaling<sup>2, 3, 4, 12</sup> and the fact that CD5-expression levels on  
384 thymocytes correlated with the strengths of the positively selecting TCR–MHC-ligand interactions  
385<sup>4</sup>, such CD5<sup>lo/neg</sup> B-1 cells might have lower levels of self-reactivity<sup>19, 20, 21, 22</sup> and lack the need for  
386 CD5-mediated silencing of BCR-signaling in order to avoid inappropriate hyperactivation of these  
387 self-reactive B cells. De novo development of both CD5+ and CD5- B-1 cells has been reported  
388 to occur also in stromal cell cultures seeded with B-1 cell precursors<sup>49</sup>. It remains to be explored  
389 whether the presence of DAMPS in those in vitro cultures could contribute to the loss of CD5 on  
390 initially CD5+ B-1 cells, or whether these cells never expressed CD5.

391 Our data are not consistent with early reports suggesting that CD5+ B-1 cells could only  
392 reconstitute themselves, but not CD5- B-1 cells<sup>48, 50</sup>, as reconstitution of neonatal mice with even  
393 very highly FACS-purified body cavity CD5+ B-1 cells led to significant numbers of CD5- B-1 cells  
394 recovered from these mice and B-1b<sup>(33)</sup> and Figs. 4/5). This discrepancy remains to be further  
395 explored.

396 The reorganization of the IgM-BCR complex, including the loss of CD5, may allow B-1  
397 cells to gain responsiveness to BCR engagement and subsequent antigen-specific proliferating  
398 and differentiation. The activating antigen may be either a foreign antigen, or self-antigens  
399 induced at sites of infection and inflammation. The differentiation of B-1 cells during an infection  
400 might thus involve a two-step process: A first TLR-mediated signal that renders B-1 cells receptive

401 to BCR signaling and a second antigen-specific signal through antigen engagement with the BCR.  
402 Additional positive or negative signals might also be involved.

403 An alternative model would involve the direct linking of TLR and BCR-signalosome effects.  
404 For example, low-affinity BCR-antigen interactions might be supported by having DAMPS and  
405 PAMPS first bind to TLR on the B cell surface, which then brings these antigens in close proximity  
406 to the BCR, triggering antigen-specific BCR activation event. Or, internalization of antigen-BCR  
407 complexes could engage endosomal TLRs. Although we did not provide antigens other than TLR-  
408 ligands to our *in vitro* cultures, dead and dying cells may provide ample DAMPS, including PTC,  
409 that could have stimulated these cells. This could explain why we found such strong enrichment  
410 for PTC-binders among cultures of TLR-stimulated B-1 cells and the CpG-stimulation dependent  
411 activation of the BCR signaling pathways.

412 The lack of phenotypic differences between CD5<sup>-</sup> B-1 cells and B-2 cell-derived non-  
413 switched plasmablasts, both expressing CD19, CD43 low levels of CD45 and lacking IgD, further  
414 complicates the identification of responding B cell subsets *in vivo*, as demonstrated with the  
415 analysis to the *Salmonella* antigen OmpD. Using allotype-marked B cell lineages, we show here  
416 that anti-OmpD secreting B cells were derived predominantly from B-2 cells in our system, and  
417 not as previously suggested from B-1b cells<sup>32</sup>. When CD5<sup>+</sup> B-1 cells lose CD5, they also  
418 upregulate CD138, thus becoming indistinguishable from B-2-derived plasma cells and  
419 plasmablasts that carry the same phenotype. Some have used expression of CD11b to identify  
420 B-1 versus B-2 cells in infectious models<sup>29, 32</sup>, but this marker is also dynamically regulated  
421 depending on tissue site and B-1 cell activation status<sup>34, 44, 51</sup>. Recent lineage-tracing approaches  
422<sup>13, 14, 52</sup> may provide novel approaches and markers that unequivocally identify B-1 cells. In the  
423 meantime, the use of neonatal B-1 allotype-chimeras remains a valuable tool for such analyzes.

424 Taken together, our data suggest that the BCR-complex composition on neonatally-  
425 derived, self-reactive B-1 cells is controlled by TLR-mediated signals, preventing inappropriate  
426 activation and autoimmune disease on the one hand, while facilitating rapid B-1 cell participation



427 in anti-viral and anti-bacterial infections on the other. TLR-signaling thereby influences not only  
428 innate but also antigen-specific B-1 cell activation.  
429

## 430 **Materials and Methods**

### 431 *Mice*

432 8-16 week old male and female C57BL/6J mice and breeding pairs of B6.Cg-  
433 Gpi1<sup>a</sup>Thy1<sup>a</sup>Igh<sup>a</sup>/J (Igh<sup>a</sup>) were purchased from The Jackson Laboratory. Female, 10 weeks old  
434 BALB/C mice were purchased from Jackson Laboratory. B6-Cg-Tg(PRDM1-EYFP)<sup>1Mnz</sup> (Blimp-1  
435 YFP) breeders were kindly provided by Michel Nussenzweig (The Rockefeller University, NY) and  
436 breeding pairs of Tlr2<sup>-/-</sup> x Tlr4<sup>-/-</sup> xUnc93b1<sup>3d/3d</sup> (TLR<sup>-/-</sup>) mice by Greg Barton (University of  
437 California, Berkeley, CA). Mice were housed under SPF conditions in micro-isolator cages with  
438 food and water provided ad libitum. Mice were euthanized by overexposure to carbon dioxide. All  
439 procedures were approved by the UC Davis Animal Care and Use Committee.

440

### 441 *Chimera generation*

442 Neonatal chimeric mice were generated as described previously<sup>53</sup>. Briefly, one-day old  
443 Igh<sup>a</sup> C57BL/6 congenic mice were injected intraperitoneally with anti-IgM<sup>a</sup> (DS-1.1) diluted in PBS.  
444 On day 2 or 3 after birth mice were injected with total peritoneal cavity wash out, or with FACS-  
445 purified dump- CD19<sup>+</sup> CD43<sup>+</sup> CD5<sup>+</sup> and/or CD5<sup>-</sup> B-1 cells from C57BL/6 or TLR<sup>-/-</sup> mice (Igh<sup>b</sup>)  
446 mice. Intraperitoneal anti-IgM<sup>a</sup> injections were continued twice weekly until mice reached 6 weeks  
447 of age. Mice were then rested for at least 6 weeks before use, for reconstitution of the conventional  
448 B cell populations from the host bone marrow.

449

### 450 *Influenza virus infection*

451 Influenza A/Puerto Rico/8/34 was grown and harvested as previously described<sup>54</sup>. Mice  
452 were anesthetized with isoflurane and virus was diluted to a previously titrated sublethal dose of  
453 infection and administered intranasally in PBS.

454

### 455 *Salmonella typhimurium infection*

456 Oral infections with *S. typhimurium* were performed following previously described  
457 protocols<sup>55</sup>. *S. typhimurium*, strain SL1344, kindly provided by Stephen McSorley (University of  
458 California, Davis, CA), was grown overnight at 37°C in Luria-Bertani broth. A known volume of  
459 bacteria were centrifuged for 20 minutes at 6,000-8,000 rcf at 4°C after concentration was  
460 determined by spectrophotometer reading at OD<sub>600</sub>. Bacterial pellets were resuspended in mouse  
461 drinking water to a concentration of 10<sup>9</sup> CFU/ml. Water was provided to mice ad lib.

462

#### 463 *Flow cytometry and sorting*

464 Tissues were processed and stained as described previously<sup>56</sup>. Briefly, single cell  
465 suspensions of spleen, lymph node, and Peyer's patches were obtained by grinding tissues  
466 between the frosted ends of two microscope slides, then resuspended in "Staining Media"<sup>56</sup>.  
467 Peritoneal cavity washout was obtained by introducing Staining Media into the peritoneal cavity  
468 with a glass pipet and bulb, agitating the abdomen, and then removing the media. Samples were  
469 filtered through nylon mesh and treated with ACK lysis buffer as needed. Cell counts were  
470 performed using Trypan Blue exclusion to identify live cells.

471 Fc receptors were blocked using anti-CD16/32 antibody (2.4G2) and cells were stained  
472 using fluorochrome conjugates generated in-house unless otherwise specified against the  
473 following antigens: CD19 (clone ID3)-Cy5PE, allophycocyanin, FITC, CD4- (GK1.5), CD8a- (53-  
474 6.7), CD90.2- (30H12.1), Gr1- (RB68-C5), F4/80- (F4/80), and NK1.1- (PK136) Pacific blue  
475 ("Dump"), CD43- (S7) allophycocyanin or PE, IgM- (331) allophycocyanin, Cy7-allophycocyanin,  
476 FITC, Alexa700, IgM<sup>a</sup>- (DS-1.1) allophycocyanin, biotin, IgM<sup>b</sup>- (AF6-78.2.5) allophycocyanin,  
477 FITC, biotin, CD5- (53-7.8) PE, biotin, IgD- (11-26) Cy7PE, Cy5.5PE, CD138- (281-2)  
478 allophycocyanin, PE; CD138-BV605 (BD Bioscience), CD19-BV786, PE-CF594 (BD Bioscience),  
479 SA-Qdot605 (Invitrogen), SA- allophycocyanin (eBioscience), BrDU-FITC (BD Bioscience), B220  
480 (CD45R) APC-eFluor 780 (Invitrogen) and CD23-biotin (eBioscience), BV605, BV711 (BD  
481 Bioscience). PTC-FITC liposomes were a kind gift of Aaron Kantor (Stanford University, CA).

482 Dead cells were identified using Live/Dead Fixable Aqua or Live/Dead Fixable Violet stain  
483 (Invitrogen).

484 Intracellular staining: Cells were surfaced stained, then fixed (eBioscience IC Fixation  
485 Buffer) for 30 minutes and then permeabilized (eBioscience Permeabilization Buffer) for 30  
486 minutes, followed by staining with anti-Nur77-Alexa Fluor 488 for 30 minutes all at room  
487 temperature.

488 Phosphoflow: Cells were fixed (BD Cytofix) for 12 minutes at 37 °C. Cells were then  
489 permeabilized (BD Perm Buffer III) for 30 minutes on ice and intracellularly stained with anti-  
490 phospho-Akt-Alexa Fluor 488 for 30 min on ice.

491 FACS analysis was done using either a 4-laser, 22-parameter LSR Fortessa (BD  
492 Bioscience) or a 3-laser FACS Aria (BD Bioscience). Cells were sorted as previously described<sup>56</sup>  
493 using the FACS Aria and a 100 µm nozzle. Data were analyzed using FlowJo software (FlowJo  
494 LLC, kind gift of Adam Treister).

495

#### 496 *ELISA*

497 Sandwich ELISA was performed as previously described<sup>56</sup>. Briefly, MaxiSorp 96 well  
498 plates (ThermoFisher) were coated with anti-IgM (Southern Biotech) and nonspecific binding was  
499 blocked with 1% NCS/0.1% dried milk powder, 0.05% Tween20 in PBS ("ELISA Blocking Buffer").  
500 Two-fold serial dilutions in PBS of culture supernatants and an IgM standard (Southern Biotech)  
501 were added to the plates at previously optimized starting dilutions. Binding was revealed with  
502 biotinylated anti-IgM (Southern Biotech), Streptavidin-Horseradish Peroxidase, both diluted in  
503 ELISA Blocking Buffer, and 0.005% 3,3',5,5'-tetramethylbenzidine (TMB)/0.015% hydrogen  
504 peroxide in 0.05 M citric acid. The reaction was stopped with 1N sulfuric acid. Antibody  
505 concentrations were determined by measuring sample absorbance on a spectrophotometer  
506 (SpectraMax M5, Molecular Devices) at 450 nm (595 nm reference wavelength) and then  
507 compared to a standard curve created with a mouse IgM standard (Southern Biotech) of known  
508 concentration.

509

510 *Culture and proliferation dye labeling*

511           After FACS sorting, cells were labeled with Efluor670 or CFSE at previously determined  
512 optimal concentrations, by incubation at 37°C for 10 mins., then washed three times with staining  
513 medium containing 10% neonatal calf serum and resuspended into “Culture Media” (RPMI 1640  
514 with 10% heat inactivated fetal bovine serum, 292 µg/ml L-glutamine, 100 Units/ml penicillin, 100  
515 µg/ml streptomycin, and 50 µM 2-mercaptoethanol). Cells were plated at 10<sup>5</sup> cells/well of 96-well  
516 U bottom tissue culture plates (BD Bioscience), and unless otherwise indicated, cultured at  
517 37°C/5% CO<sub>2</sub> for 3 days. When indicated, LPS at 10 µg/ml, Mycobacterium TB lipids at 20 µg/ml  
518 (BIA), Imiquimod (R837, InvivoGen) at 1 µg/ml, CpG ODN 7909 at 5 µg/ml or anti-IgM (Fab)<sub>2</sub> at  
519 10-20ug/ml were added to the wells. Cell enumeration after culture was performed using  
520 Molecular Probes CountBright Beads (Thermo Fisher) by flow cytometry, per manufacturer  
521 instructions. After culture, culture plates were spun and supernatant was collected and stored at  
522 -20°C, and cells were stained for FACS.

523

524 *ELISPOT*

525           IgM antibody secreting cells were enumerated as previously described<sup>54</sup>. Briefly, 96 well  
526 ELISPOT plates (Multi-Screen HA Filtration, Millipore) were coated overnight with anti-IgM (331)  
527 or recombinant OmpD (MyBioSource) and non-specific binding was blocked with 4% Bovine  
528 Serum Albumin (BSA)/PBS. Cell suspensions were processed, counted, and directly plated in  
529 culture medium into ELISPOT wells and subsequently serially diluted two-fold, or they were  
530 FACS-sorted directly into culture media-containing ELISPOT wells. Cells were incubated  
531 overnight at 37°C/5% CO<sub>2</sub>. Binding was revealed with biotinylated anti-IgM (Southern Biotech),  
532 anti-IgM<sup>a</sup> (BD Bioscience), or anti-IgM<sup>b</sup> (BD Bioscience), Streptavidin-Horseradish Peroxidase  
533 (Vector Labs) both diluted in 2% BSA/PBS, and 3.3 mg 3-amino-9-ethylcarbazole (Sigma Aldrich)  
534 dissolved in dimethyl formamide/0.015% hydrogen peroxide/0.1M sodium acetate. The reaction

535 was stopped with water. Spots were enumerated using the AID EliSpot Reader System  
536 (Autoimmun Diagnostika, Strassberg, Germany).

537

#### 538 *qRT-PCR*

539 mRNA was isolated from cells using the RNeasy mini kit (Qiagen), per manufacturer  
540 instructions. cDNA was generated using random hexamer primers and SuperSript II reverse  
541 transcriptase (Invitrogen). qRT-PCR was performed using commercially available Taqman  
542 primer/probes for *cd5* and *ubc* (Thermo Fisher).

543

#### 544 *BrDU labeling*

545 Mice were injected intraperitoneally with 1 mg of BrDU (Sigma-Aldrich) per mouse diluted  
546 in 100  $\mu$ L PBS, 24 hours before tissue collection. Staining for BrDU was performed as described  
547 previously<sup>56</sup>.

548

#### 549 *Proximity Ligation Assay (PLA)*

550 After FACS sorting, cells were resuspended in RPMI and rested for at least two hours before  
551 designated stimuli were added to culture media. Stimulated and unstimulated cells were cultured  
552 for 5 minutes, and 24 and 48 hours prior to PLA. PLA was performed as previously described<sup>57</sup>.

553 In brief: For PLA-probes against specific targets, the following unlabeled Abs were used: anti-IgM  
554 (Biolegend, clone RMM-1), anti-CD79a (Thermo Fisher, clone 24C2.5), anti-CD5 (Biolegend,  
555 clone 53-7.3), anti-Syk (Biolegend, clone Syk-01), and anti-CD19 (Biolegend, clone 6D5). Fab  
556 fragments against CD79a, Syk, IgM, and CD19 were prepared with Pierce Fab Micro preparation  
557 kit (Thermo Scientific) using immobilized papain according to the manufacturer's protocol. After  
558 desalting (Zeba spin desalting columns, Thermo Scientific), all antibodies were coupled with PLA  
559 Probemaker Plus or Minus oligonucleotides (Sigma-Aldrich) to generate PLA-probes. For in situ  
560 PLA, B cells were settled on polytetrafluoroethylene slides (Thermo Fisher Scientific) for 30 min  
561 at 37 °C. BCR. Cells were fixed with paraformaldehyde 4%, for 20 min. For intracellular PLA, B

562 cells were permeabilized with 0,5% Saponin for 30 min at room temperature, and blocked for  
563 30min with Blocking buffer (containing 25 µg/ml sonicated salmon sperm DNA, and 250 µg/ml  
564 bovine serum albumin). PLA was performed with the Duolink In-Situ-Orange kit. Resulting  
565 samples were directly mounted on slides with DAPI Fluoromount-G (SouthernBiotech) to visualize  
566 the PLA signals in relationship to the nuclei. Microscope images were acquired with a Leica DMI8  
567 microscope, 63 oil objective (Leica-microsystems). For each experiment a minimum of 100 B-  
568 1a/B-1b/B-2 peritoneal cavity or 1000 splenic B-2 cells from several images were analyzed with  
569 CellProfiler-3.0.0 (CellProfiler.org). Raw data were exported to Prism7 (GraphPad, La Jolla, CA).  
570 For each sample, the mean PLA signal count per cell was calculated from the corresponding  
571 images and the statistical significance with Mann–Whitney test.

572

### 573 *Statistical analysis*

574 Statistical analysis was done using a two-tailed Student t test with help of Prism software  
575 (GraphPad Software). For time-course data, an ANOVA was performed with the help of Prism  
576 software, and if significant, Student t tests were performed to determine which time points were  
577 significant. When multiple comparisons were run on the same sets of data, Holm-Sidak correction  
578 was applied, using Prism software.  $p < 0.05$  was considered statistically significant.

579

### 580 **Acknowledgements**

581 We thank Drs. Joseph Benoun and Stephen McSorley (UC Davis) for expert help in conducting  
582 infections with *S. typhimurium*, Dr. Aaron Kantor (Stanford University) for PtC liposomes, and Dr.  
583 Greg Barton (UC Berkeley) for TLR-/- mice and discussions. This work was supported through  
584 NIH/NIAID grants U19-AI109962 (N.B) and R01-117890 (N.B.), the National Center for Advancing  
585 Translational Sciences, NIH, through grant number UL1 TR000002 and linked award TL1  
586 TR000133 (H.P.S), the NIH -2T32OD010931-09 (H.P.S), NIH – 5T35OD010956 (H. P.S) and the  
587 T-32 AI060555 (H.P.S) and NIH- T32 OD011147 (F.L.S).

## 588 References

- 589
- 590 1. Melchers, F. Checkpoints that control B cell development. *J Clin Invest* **125**, 2203-2210
- 591 (2015).
- 592
- 593 2. Hippen, K.L., Tze, L.E. & Behrens, T.W. CD5 maintains tolerance in anergic B cells. *J Exp*
- 594 *Med* **191**, 883-890 (2000).
- 595
- 596 3. Punt, J.A., Osborne, B.A., Takahama, Y., Sharrow, S.O. & Singer, A. Negative selection
- 597 of CD4+CD8+ thymocytes by T cell receptor-induced apoptosis requires a costimulatory
- 598 signal that can be provided by CD28. *J Exp Med* **179**, 709-713 (1994).
- 599
- 600 4. Azzam, H.S. *et al.* CD5 Expression Is Developmentally Regulated By T Cell Receptor
- 601 (TCR) Signals and TCR Avidity. *The Journal of Experimental Medicine* **188**, 2301-2311
- 602 (1998).
- 603
- 604 5. Berland, R. & Wortis, H.H. Origins and functions of B-1 cells with notes on the role of CD5.
- 605 *Annu Rev Immunol* **20**, 253-300 (2002).
- 606
- 607 6. Biancone, L. *et al.* Identification of a novel inducible cell-surface ligand of CD5 on activated
- 608 lymphocytes. *J Exp Med* **184**, 811-819 (1996).
- 609
- 610 7. Bikah, G., Lynd, F.M., Aruffo, A.A., Ledbetter, J.A. & Bondada, S. A role for CD5 in cognate
- 611 interactions between T cells and B cells, and identification of a novel ligand for CD5. *Int*
- 612 *Immunol* **10**, 1185-1196 (1998).
- 613
- 614 8. Brown, M.H. & Lacey, E. A Ligand for CD5 Is CD5. *The Journal of Immunology* **185**, 6068-
- 615 6074 (2010).
- 616
- 617 9. Calvo, J. *et al.* Interaction of recombinant and natural soluble CD5 forms with an
- 618 alternative cell surface ligand. *Eur J Immunol* **29**, 2119-2129 (1999).
- 619
- 620 10. Pospisil, R., Fitts, M.G. & Mage, R.G. CD5 is a potential selecting ligand for B cell surface
- 621 immunoglobulin framework region sequences. *J Exp Med* **184**, 1279-1284 (1996).
- 622
- 623 11. Van de Velde, H., von Hoegen, I., Luo, W., Parnes, J.R. & Thielemans, K. The B-cell
- 624 surface protein CD72/Lyb-2 is the ligand for CD5. *Nature* **351**, 662-665 (1991).
- 625
- 626 12. Perez-Villar, J.J. *et al.* CD5 negatively regulates the T-cell antigen receptor signal
- 627 transduction pathway: involvement of SH2-containing phosphotyrosine phosphatase
- 628 SHP-1. *Mol Cell Biol* **19**, 2903-2912 (1999).
- 629
- 630 13. Yuan, J., Nguyen, C.K., Liu, X., Kanellopoulou, C. & Muljo, S.A. Lin28b reprograms adult
- 631 bone marrow hematopoietic progenitors to mediate fetal-like lymphopoiesis. *Science* **335**,
- 632 1195-1200 (2012).
- 633
- 634 14. Zhou, Y. *et al.* Lin28b promotes fetal B lymphopoiesis through the transcription factor
- 635 Arid3a. *J Exp Med* **212**, 569-580 (2015).
- 636
- 637 15. Hardy, R.R. & Hayakawa, K. B cell development pathways. *Annu Rev Immunol* **19**, 595-
- 638 621 (2001).
- 639
- 640 16. Casola, S. *et al.* B cell receptor signal strength determines B cell fate. *Nat Immunol* **5**, 317-
- 641 327 (2004).



- 642  
643 17. Hayakawa, K. & Hardy, R.R. Development and function of B-1 cells. *Curr Opin Immunol*  
644 **12**, 346-353 (2000).  
645  
646 18. Nguyen, T.T. *et al.* The IgM receptor FcμR limits tonic BCR signaling by regulating  
647 expression of the IgM BCR. *Nat Immunol* (2017).  
648  
649 19. Hayakawa, K. *et al.* Positive selection of natural autoreactive B cells. *Science* **285**, 113-  
650 116 (1999).  
651  
652 20. Lalor, P.A. & Morahan, G. The peritoneal Ly-1 (CD5) B cell repertoire is unique among  
653 murine B cell repertoires. *Eur J Immunol* **20**, 485-492 (1990).  
654  
655 21. Micolino, T.J., Arnold, L.W., Hawkins, L.A. & Houghton, G. Normal mouse peritoneum  
656 contains a large population of Ly-1+ (CD5) B cells that recognize phosphatidyl choline.  
657 Relationship to cells that secrete hemolytic antibody specific for autologous erythrocytes.  
658 *J Exp Med* **168**, 687-698 (1988).  
659  
660 22. Yang, Y. *et al.* Distinct mechanisms define murine B cell lineage immunoglobulin heavy  
661 chain (IgH) repertoires. *Elife* **4** (2015).  
662  
663 23. Morris, D.L. & Rothstein, T.L. Abnormal transcription factor induction through the surface  
664 immunoglobulin M receptor of B-1 lymphocytes. *J Exp Med* **177**, 857-861 (1993).  
665  
666 24. Tarakhovsky, A., Muller, W. & Rajewsky, K. Lymphocyte populations and immune  
667 responses in CD5-deficient mice. *Eur J Immunol* **24**, 1678-1684 (1994).  
668  
669 25. Bikah, G., Carey, J., Ciallella, J.R., Tarakhovsky, A. & Bondada, S. CD5-mediated  
670 negative regulation of antigen receptor-induced growth signals in B-1 B cells. *Science* **274**,  
671 1906-1909 (1996).  
672  
673 26. Baumgarth, N., Waffarn, E.E. & Nguyen, T.T. Natural and induced B-1 cell immunity to  
674 infections raises questions of nature versus nurture. *Ann N Y Acad Sci* **1362**, 188-199  
675 (2015).  
676  
677 27. Ochsenbein, A.F. *et al.* Control of early viral and bacterial distribution and disease by  
678 natural antibodies. *Science* **286**, 2156-2159 (1999).  
679  
680 28. Hayakawa, K. *et al.* Positive selection of anti-thy-1 autoreactive B-1 cells and natural  
681 serum autoantibody production independent from bone marrow B cell development. *J Exp*  
682 *Med* **197**, 87-99 (2003).  
683  
684 29. Haas, K.M., Poe, J.C., Steeber, D.A. & Tedder, T.F. B-1a and B-1b cells exhibit distinct  
685 developmental requirements and have unique functional roles in innate and adaptive  
686 immunity to *S. pneumoniae*. *Immunity* **23**, 7-18 (2005).  
687  
688 30. Alugupalli, K.R. *et al.* The resolution of relapsing fever borreliosis requires IgM and is  
689 concurrent with expansion of B1b lymphocytes. *J Immunol* **170**, 3819-3827 (2003).  
690  
691 31. Alugupalli, K.R. *et al.* B1b lymphocytes confer T cell-independent long-lasting immunity.  
692 *Immunity* **21**, 379-390 (2004).  
693  
694 32. Gil-Cruz, C. *et al.* The porin OmpD from nontyphoidal *Salmonella* is a key target for a  
695 protective B1b cell antibody response. *Proc Natl Acad Sci U S A* **106**, 9803-9808 (2009).

- 696  
697 33. Choi, Y.S. & Baumgarth, N. Dual role for B-1a cells in immunity to influenza virus infection.  
698 *J Exp Med* **205**, 3053-3064 (2008).  
699  
700 34. Waffarn, E.E. *et al.* Infection-induced type I interferons activate CD11b on B-1 cells for  
701 subsequent lymph node accumulation. *Nature communications* **6**, 8991 (2015).  
702  
703 35. Savage, H.P. *et al.* Blimp-1–dependent and –independent natural antibody production by  
704 B-1 and B-1–derived plasma cells. *The Journal of Experimental Medicine* **214**, 2777-2794  
705 (2017).  
706  
707 36. Lalor, P.A., Herzenberg, L.A., Adams, S. & Stall, A.M. Feedback regulation of murine Ly-  
708 1 B cell development. *Eur J Immunol* **19**, 507-513 (1989).  
709  
710 37. Baumgarth, N. *et al.* B-1 and B-2 cell-derived immunoglobulin M antibodies are  
711 nonredundant components of the protective response to influenza virus infection. *J Exp*  
712 *Med* **192**, 271-280 (2000).  
713  
714 38. Fooksman, D.R. *et al.* Development and Migration of Pre-Plasma Cells in the Mouse  
715 Lymph Node. *Immunity* **33**, 118-127 (2010).  
716  
717 39. Rutishauser, R.L. *et al.* Transcriptional Repressor Blimp-1 Promotes CD8<sup>+</sup>  
718 T Cell Terminal Differentiation and Represses the Acquisition of Central Memory T Cell  
719 Properties. *Immunity* **31**, 296-308 (2009).  
720  
721 40. Su, S.D., Ward, M.M., Apicella, M.A. & Ward, R.E. The primary B cell response to the  
722 O/core region of bacterial lipopolysaccharide is restricted to the Ly-1 lineage. *J Immunol*  
723 **146**, 327-331 (1991).  
724  
725 41. Arnold, L.W. & Haughton, G. Autoantibodies to phosphatidylcholine. The murine  
726 antibromelain RBC response. *Ann N Y Acad Sci* **651**, 354-359 (1992).  
727  
728 42. Alugupalli, K.R. & Gerstein, R.M. Divide and conquer: division of labor by B-1 B cells.  
729 *Immunity* **23**, 1-2 (2005).  
730  
731 43. Marshall, J.L. *et al.* The capsular polysaccharide Vi from *Salmonella typhi* is a B1b antigen.  
732 *J Immunol* **189**, 5527-5532 (2012).  
733  
734 44. Ohdan, H. *et al.* Mac-1-negative B-1b phenotype of natural antibody-producing cells,  
735 including those responding to Gal alpha 1,3Gal epitopes in alpha 1,3-  
736 galactosyltransferase-deficient mice. *J Immunol* **165**, 5518-5529 (2000).  
737  
738 45. Masmoudi, H., Mota-Santos, T., Huetz, F., Coutinho, A. & Cazenave, P.A. All T15 Id-  
739 positive antibodies (but not the majority of VHT15+ antibodies) are produced by peritoneal  
740 CD5+ B lymphocytes. *Int Immunol* **2**, 515-520 (1990).  
741  
742 46. Hayakawa, K. *et al.* Ly-1 B cells: functionally distinct lymphocytes that secrete IgM  
743 autoantibodies. *Proceedings of the National Academy of Sciences* **81**, 2494-2498 (1984).  
744  
745 47. Foote, J.B. & Kearney, J.F. Generation of B cell memory to the bacterial polysaccharide  
746 alpha-1,3 dextran. *J Immunol* **183**, 6359-6368 (2009).  
747

- 748 48. Kantor, A.B., Stall, A.M., Adams, S. & Herzenberg, L.A. Differential development of  
749 progenitor activity for three B-cell lineages. *Proc Natl Acad Sci U S A* **89**, 3320-3324  
750 (1992).  
751
- 752 49. Montecino-Rodriguez, E., Leathers, H. & Dorshkind, K. Identification of a B-1 B cell-  
753 specified progenitor. *Nat Immunol* **7**, 293-301 (2006).  
754
- 755 50. Stall, A.M., Adams, S., Herzenberg, L.A. & Kantor, A.B. Characteristics and development  
756 of the murine B-1b (Ly-1 B sister) cell population. *Ann N Y Acad Sci* **651**, 33-43 (1992).  
757
- 758 51. Yang, Y., Tung, J.W., Ghosn, E.E., Herzenberg, L.A. & Herzenberg, L.A. Division and  
759 differentiation of natural antibody-producing cells in mouse spleen. *Proc Natl Acad Sci U*  
760 *S A* **104**, 4542-4546 (2007).  
761
- 762 52. Montecino-Rodriguez, E. *et al.* Distinct Genetic Networks Orchestrate the Emergence of  
763 Specific Waves of Fetal and Adult B-1 and B-2 Development. *Immunity* **45**, 527-539  
764 (2016).  
765
- 766 53. Baumgarth, N. *et al.* Innate and acquired humoral immunities to influenza virus are  
767 mediated by distinct arms of the immune system. *Proc Natl Acad Sci U S A* **96**, 2250-2255  
768 (1999).  
769
- 770 54. Doucett, V.P. *et al.* Enumeration and characterization of virus-specific B cells by multicolor  
771 flow cytometry. *J Immunol Methods* **303**, 40-52 (2005).  
772
- 773 55. O'Donnell, H., Pham, O.H., Benoun, J.M., Ravesloot-Chávez, M.M. & McSorley, S.J.  
774 Contaminated water delivery as a simple and effective method of experimental Salmonella  
775 infection. *Future microbiology* **10**, 1615-1627 (2015).  
776
- 777 56. Rothaeusler, K. & Baumgarth, N. Evaluation of intranuclear BrdU detection procedures for  
778 use in multicolor flow cytometry. *Cytometry A* **69**, 249-259 (2006).  
779
- 780 57. Klasener, K., Maity, P.C., Hobeika, E., Yang, J. & Reth, M. B cell activation involves  
781 nanoscale receptor reorganizations and inside-out signaling by Syk. *Elife* **3**, e02069  
782 (2014).  
783  
784
- 785

## 786 Figures

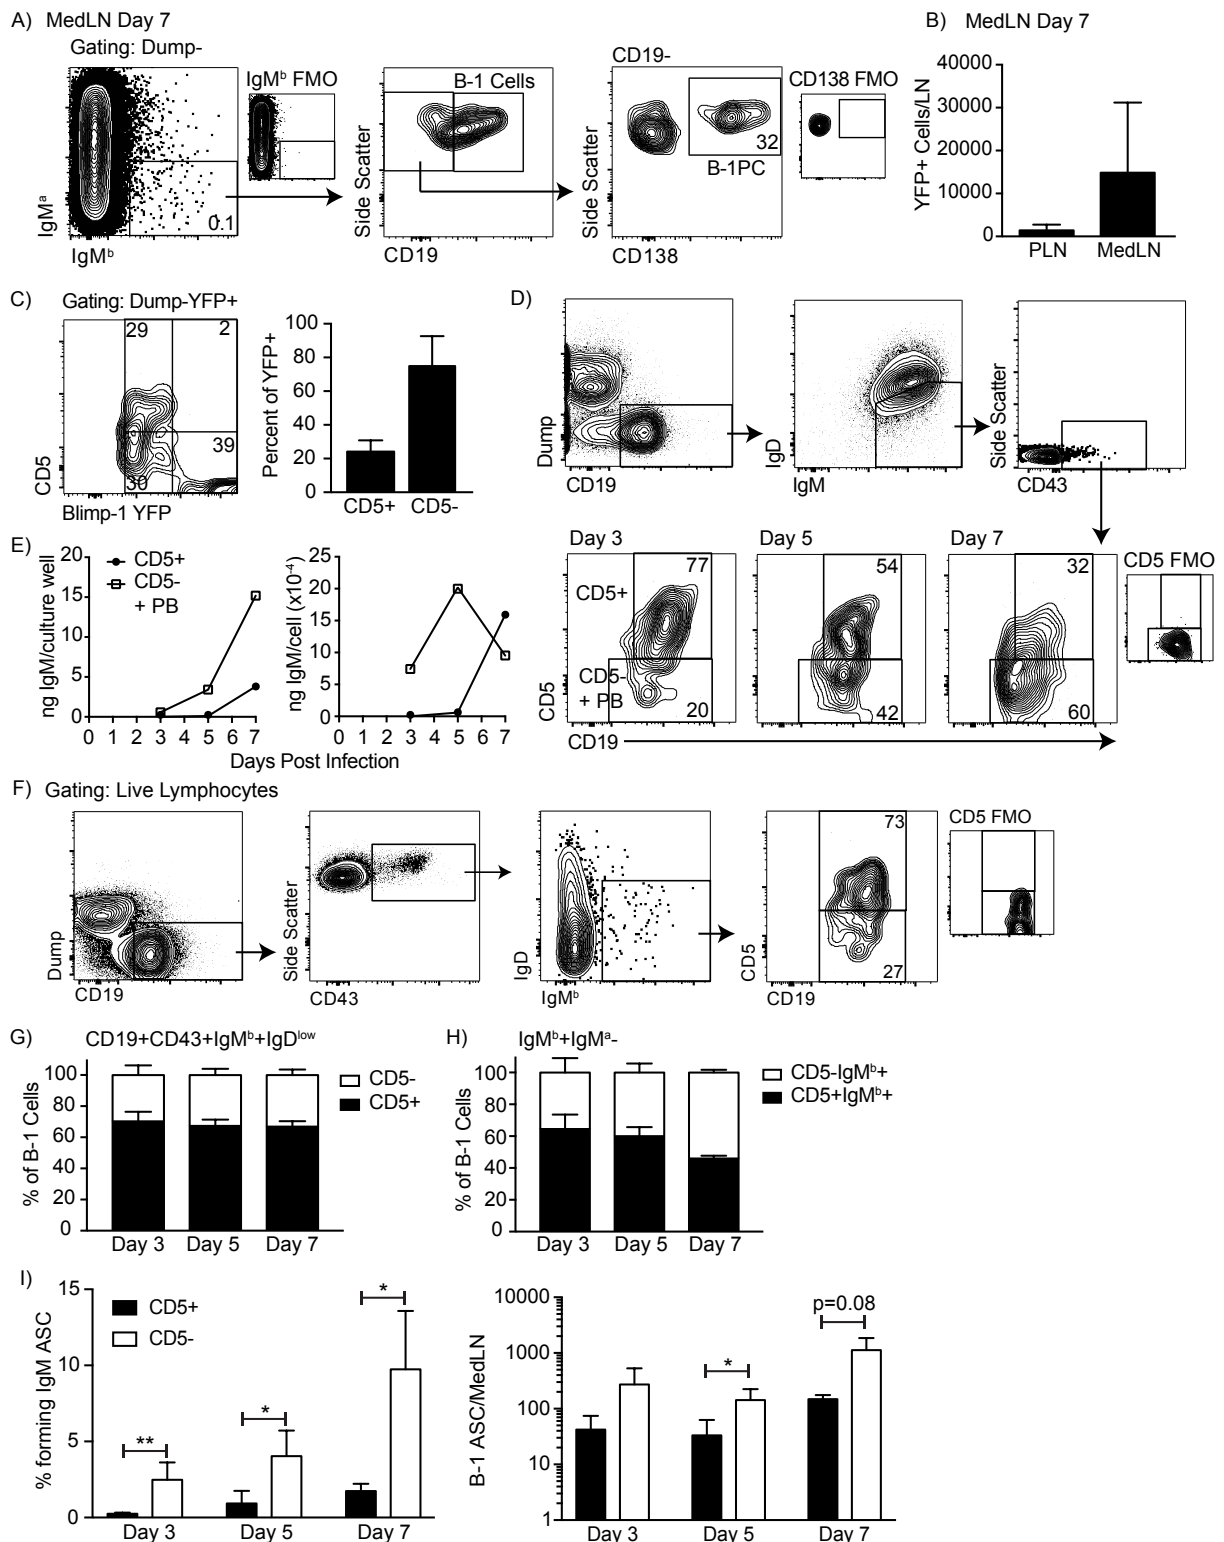

787

788 **Figure 1: CD5 negative B-1 cells secrete most IgM in the mediastinal lymph nodes (MedLN)**  
 789 **after influenza infection.** (A) FACS plot of MedLN cells from day 7 influenza-A/PR8-infected  
 790 neonatal chimeric mice generated with Ighb B-1 donor cells and Igha host cells. Shown is gating  
 791 to identify IgM<sup>b</sup>+CD19+ B-1 cells and IgM<sup>b</sup>+CD19-CD138+ B-1PC. FMO, "fluorescence minus

792 one” control stains. (B) Mean number  $\pm$  SD of Blimp YFP+ cells in peripheral LN (PLN) and MedLN  
793 of day 7 influenza-infected neonatal chimera generated with B-1 donor cells from Blimp-1-YFP  
794 mice (n=4). (C) FACS plot (left) and (right) mean percentage  $\pm$  SD of CD5+ and CD5- cells among  
795 total Blimp-1 YFP+ cells (n=13). (D) FACS gating strategy for sorting CD19+IgM+IgD<sup>lo</sup>CD43+  
796 CD5+ or CD5- cells in the MedLN on days 3, 5, or 7 after influenza infection of C57BL/6 mice,  
797 pooled from n=2-3 per time point. (E) Concentration (ng/ml) IgM in supernatant (left) and secreted  
798 (ng x 10<sup>-4</sup>) per cell (right) of sorted cells measured by ELISA. (F) FACS gating strategy and (G/H)  
799 mean percentage  $\pm$  SD of CD19+CD43+IgM<sup>b</sup>+IgD<sup>lo</sup> and CD5+ or CD5- B-1 cells among (G)  
800 Dump- CD19+ IgMb+ and (H) total (Dump- IgMb+ IgMa-) B-1 cells at indicated times after  
801 infection (n=6-7 per time point). (I) Mean percentage  $\pm$  SD (left) and total number  $\pm$  SD (right) of  
802 FACS-sorted CD5+ and CD5- B-1 cells (IgM<sup>b</sup>+IgM<sup>a-</sup>) that formed IgM antibody-secreting cells  
803 (ASC) in each MedLN, as measured by ELISPOT (n=3-4 per time point). Results are  
804 representative of >4 (A), 3 (B), and 2 (F, I), or are combined from 2 (D, E, G, H) or 3 (C)  
805 independent experiments. Values in (I) were compared by unpaired Student’s t test (\*=p<0.05,  
806 \*\*=p<0.005).  
807

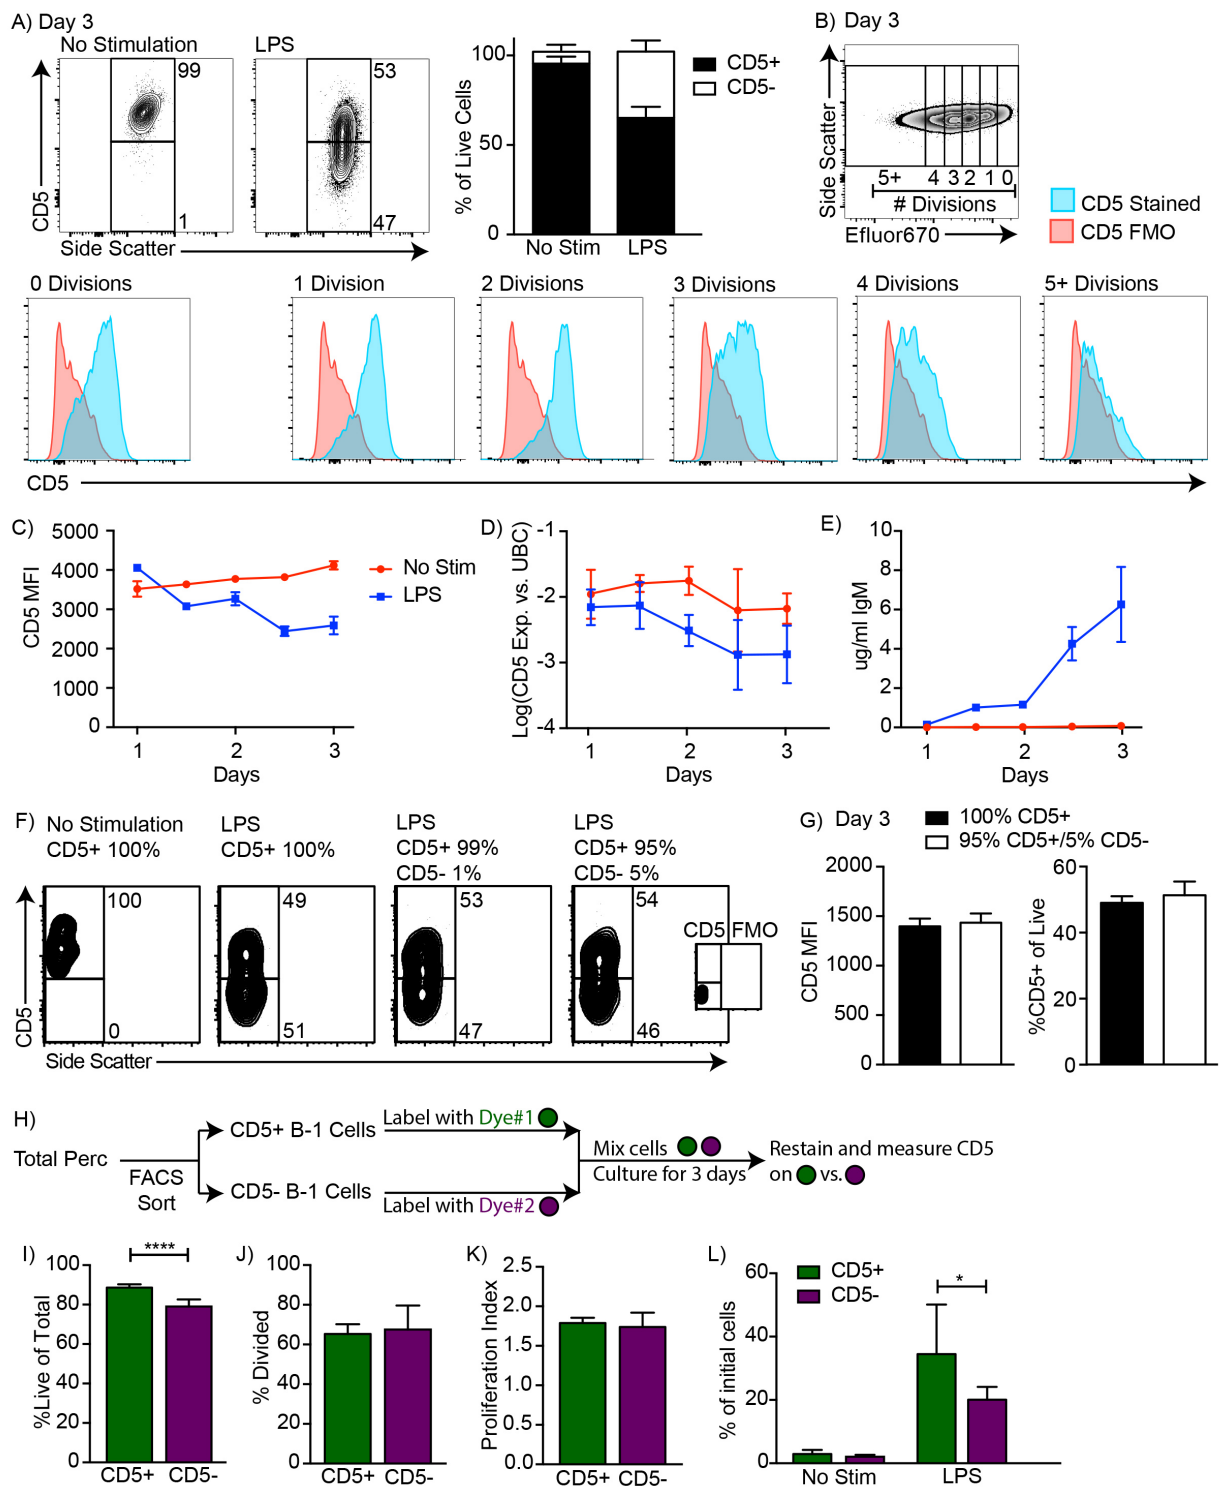

808

809 **Figure 2: CD5+ B-1 cells decrease CD5 expression after LPS stimulation *in vitro*.** (A)  
 810 Representative FACS plots (left) and mean percentage  $\pm$  SD (right) of CD5+ and CD5- B-1 cells  
 811 after FACS-purified peritoneal cavity CD19+ CD23-CD5+ B-1 cells were cultured with or without  
 812 10  $\mu$ g/ml LPS for 3 days (n=18). (B) CD5 expression on FACS-purified Efluor 670-stained  
 813 proliferating peritoneal cavity CD5+ B-1 cells stimulated with LPS compared to CD5 FMO  
 814 (fluorescence minus one) control. (C) Mean CD5 MFI  $\pm$  SD, determined by flow cytometry, (D)  
 815 mean Log(*cd5* mRNA expression)  $\pm$  SD, determined by qRT-PCR, and (E) mean IgM secretion  $\pm$   
 816 SD ( $\mu$ g/ml), determined by ELISA, after purified peritoneal cavity CD5+ B-1 cells were cultured  
 817 for indicated times with LPS (n=3-4 per time and data point). (F) FACS plots from cultures with or

818 without LPS of purified CD5+ B-1 cells mixed or not with indicated percentages of CD5- B-1 cells.  
819 (G) Mean CD5 MFI  $\pm$  SD (left) and mean percentage  $\pm$  SD of CD5+ cells (right) of cultures in F  
820 (n=3). (H) CD5+ (green) and CD5- (purple) B-1 cells were each labeled with either Efluor670 and  
821 CFSE. Dyes used to label each population were switched for repeated experiments. (I) Mean  
822 percentage  $\pm$  SD of live cells, or (J) of divided cells, (K) mean number of divisions  $\pm$  SD among  
823 cells that had divided, and (L) mean percentage  $\pm$  SD of cell numbers on day 3 compared to input  
824 numbers for CD5+ and CD5- cells cultured with LPS (n=8). Results are combined from 4 (A), or  
825 are representative of >5 (B), 4 (H-L) and 2 (C - G) independent experiments, respectively. Values  
826 in (G) and (I-L) were compared using an unpaired Student's t test (\*=p<0.05, \*\*\*\*=p<0.00005).  
827

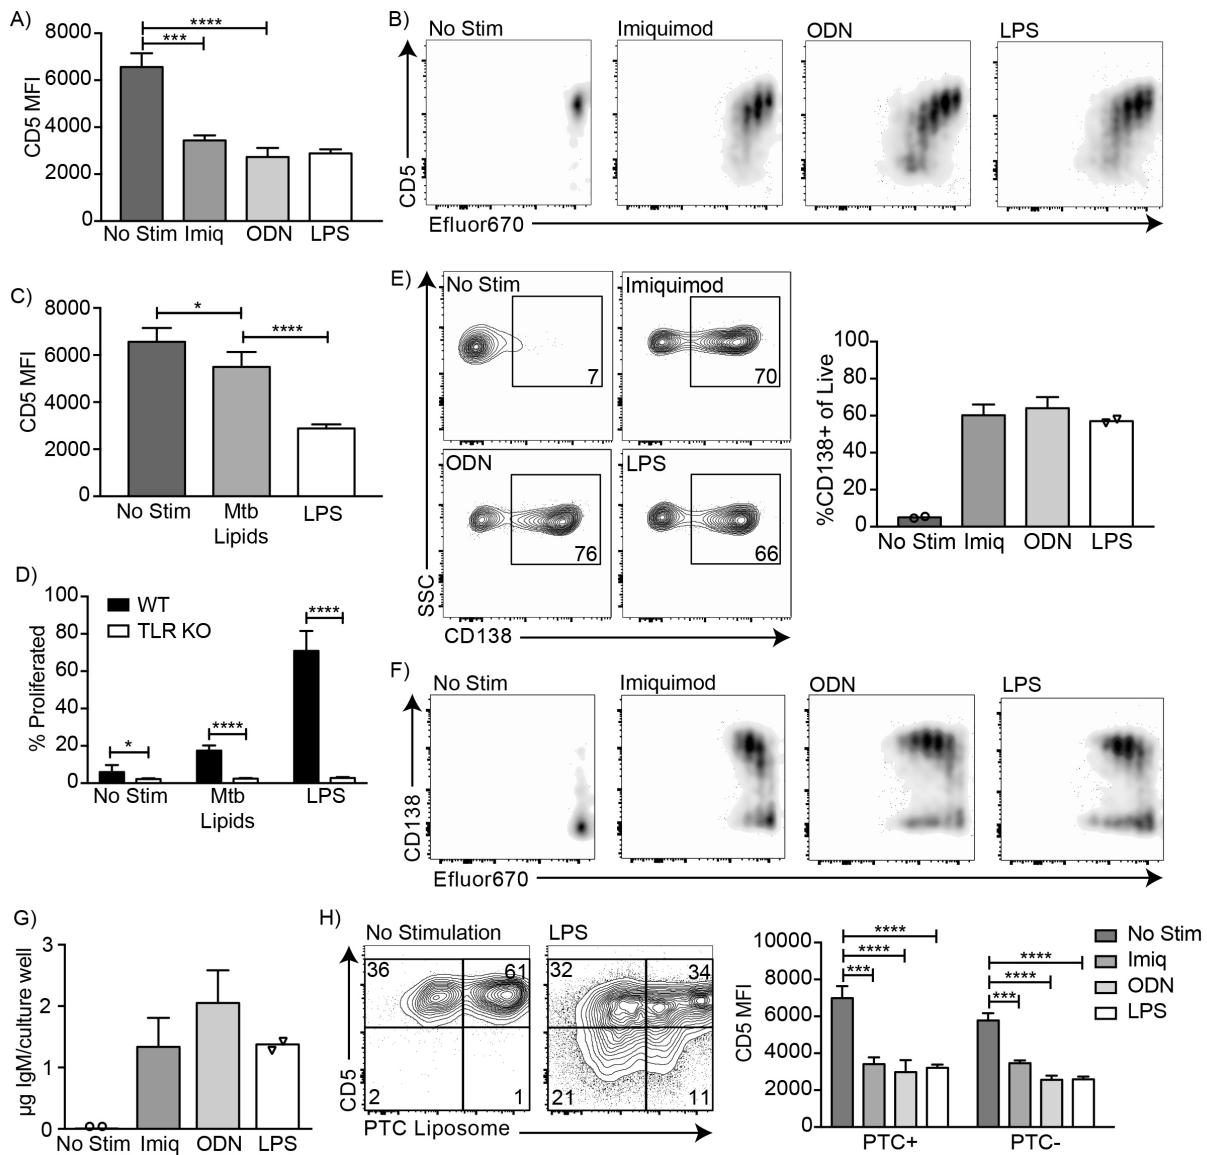

828

829 **Figure 3: CD5+ B-1 cells differentiate into CD5- IgM secreting cells after TLR-mediated**  
 830 **activation.** (A) CD5 MFI ± SD and (B) representative FACS plots for CD5+ B-1 cells cultured  
 831 without stimulation or with Imiquimod (TLR7 agonist), ODNs (CpG 7909), or LPS (n=3-5). (C)  
 832 Mean CD5 MFI ± SD of CD5+ B-1 cells cultured without stimulation or with *Mycobacterium*  
 833 *tuberculosis* (Mtb) lipids or LPS (n=4-5). (D) Mean percentage ± SD of B-1 cells from wild type  
 834 (WT) or Tlr2<sup>-/-</sup>xTlr4<sup>-/-</sup>xUnc93b1<sup>3d/3d</sup> (TLR KO) mice that underwent at least one division after  
 835 culture without stimulation or stimulated with *Mycobacterium tuberculosis* (Mtb) lipids or LPS (n=6-  
 836 9 per group). (E) FACS plots (left) and mean percentage ± SD (right) of CD138+ cells, and (F)  
 837 representative FACS plots for CD138 expression among proliferating cells. (G) Mean IgM  
 838 concentration ± SD (µg total per culture well) of cultured CD5+ B-1 cells stimulated or not with  
 839 Imiquimod (TLR7 agonist), ODNs (CpG 7909), or LPS (n=2 for no stimulation and LPS, n=5 for  
 840 Imiquimod and ODN). (H) Sample FACS plot (left) and mean CD5 MFI ± SD (right) of PTC  
 841 liposome-binding (PTC+) and non-PTC liposome-binding (PTC-) cells for CD5+ B-1 cells cultured  
 842 without stimulation or with Imiquimod (TLR7 agonist), ODNs (CpG 7909), or LPS (n=3-5). Results  
 843 are combined from two (D, E-G), or are representative of three (A) or two (B, C, H) independent  
 844 experiments, respectively. Values compared in (A, C-D) using an unpaired Student's t test  
 845 (\*=p<0.05, \*\*=p<0.005, \*\*\*=p<0.0005, \*\*\*\*=p<0.00005).

846



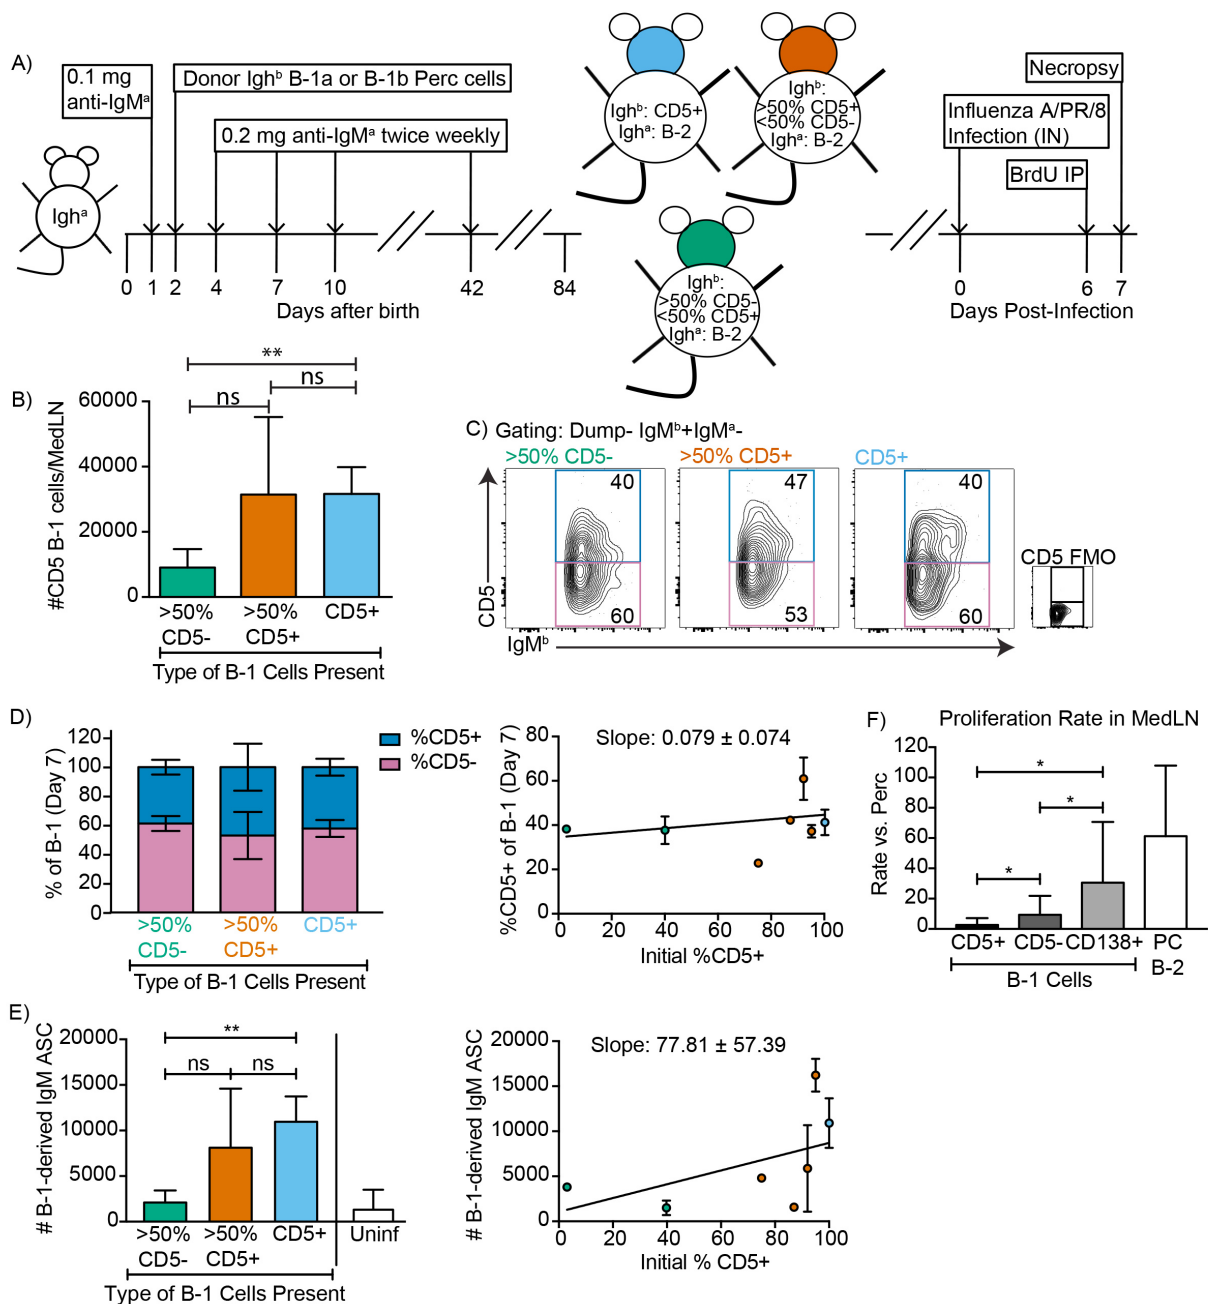

847  
848  
849  
850  
851  
852  
853  
854  
855  
856  
857  
858  
859  
860  
861  
862

**Figure 4: CD5+ B-1 cells differentiate to CD5- IgM ASC in the MedLN after Influenza infection.** (A) Neonatal chimeric mice were generated with FACS sorted CD19+ CD23- $Igh^b$ + CD5+ (100%, blue), mostly CD5+ (orange), or mostly CD5- (green) peritoneal cavity-derived B-1 cells and infected with influenza A/Puerto Rico 8/34 for 7 days. (B) Mean number  $\pm$  SD of B-1 cells in the MedLN of mice 7 days after infection. (C) FACS plot and (D) mean percentage  $\pm$  SD of Dump-  $IgM^b$ +  $IgM^a$ - CD5+ and CD5- MedLN B-1 cells on day 7. CD5 FMO (fluorescence minus one) control for CD5. (D) Mice were grouped by initial percentage of CD5+ and CD5- B-1 cells (left) and % MedLN CD5+ B-1 cells present on days 0 (initial %) and 7 of infection were plotted with a line of best fit (right). (E) Mean B-1 derived IgM ASC  $\pm$  SD per MedLN, grouped by initial percentage of CD5+ and CD5- cells (left) and plotted based on initial starting percentage of CD5+ cells (right) with a line of best fit. (F) Mean proliferation rate per day  $\pm$  SD of CD5+, CD5-, and CD138+ B-1 cells and CD138+ B-2 cells (B-2 PC) in the MedLN compared to proliferation rate per day of similar populations (B-1 or B-2 cells) in the peritoneal cavity of each mouse as determined by BrdU incorporation. Results for infected mice in (B-F) are combined from 4 independent experiments (n=4 for >50% CD5-, n= 7 for >50% CD5+ cells, n=5 for pure CD5+

863 cells). Results for uninfected chimeras in (E) are combined from 3 independent experiments, n=6.  
864 Values in (B, D-F) were compared by unpaired Student's t test (\*=p<0.05, \*\*\*=p<0.0005).  
865

866

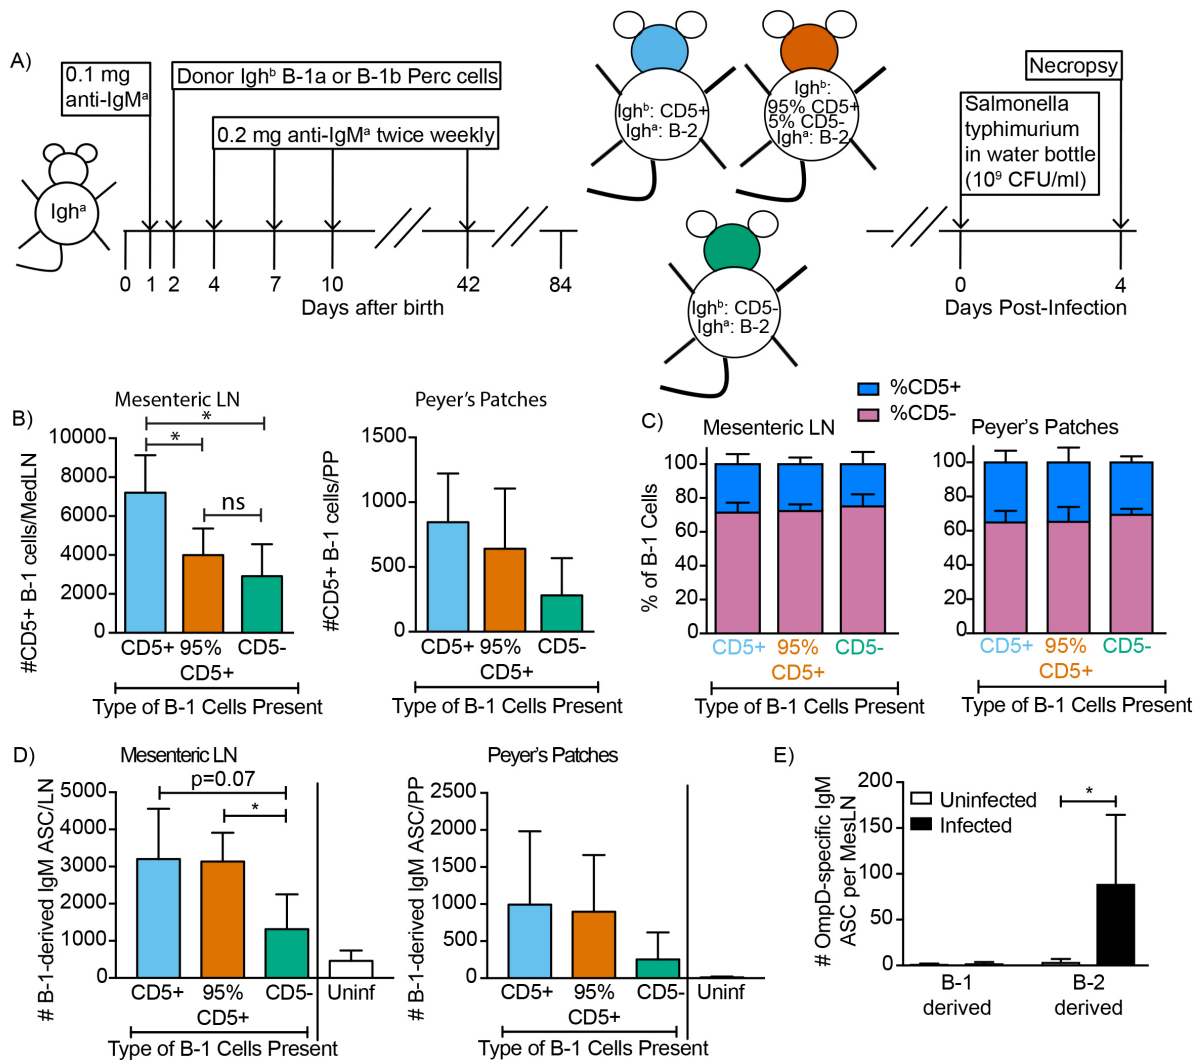

867

868 **Figure 5: CD5+ B-1 cells differentiate to CD5- IgM ASC in the MesLN, Peyer's patches, and**  
 869 **spleen after *S. typhimurium* infection.** (A) Neonatal chimeric mice were generated with FACS  
 870 sorted Dump- CD19+ CD23- Ighb+ CD5+ (100%, blue), CD5- (98%, green), or mostly CD5+  
 871 (orange) peritoneal cavity B-1 cells. Mean percentage  $\pm$  SD of CD5+ and CD5- B-1 cells  
 872 (IgMb+IgMa-) in (B) MesLN and (C) Peyer's Patches (PP) on day 4 after oral infection with  
 873 *Salmonella typhimurium* via drinking water (n= 3, CD5-; n=4, 95% CD5+; n=6, CD5+). Mean B-1  
 874 derived IgM ASC  $\pm$  SD per (D) MesLN and (E) PP (n= 3, CD5-; n=4, 95% CD5+; n=6, CD5+,  
 875 uninfected). (F) B-1 and B-2 derived OmpD-binding IgM ASC per MesLN in uninfected and  
 876 infected neonatal chimeric mice (n=5-6). Results in (B-F) are combined from 2 independent  
 877 experiments, uninfected chimeras in (D) are combined from 3 independent experiments. Values  
 878 in (B-F) were compared with an unpaired Student's t test (\*=p<0.05)  
 879

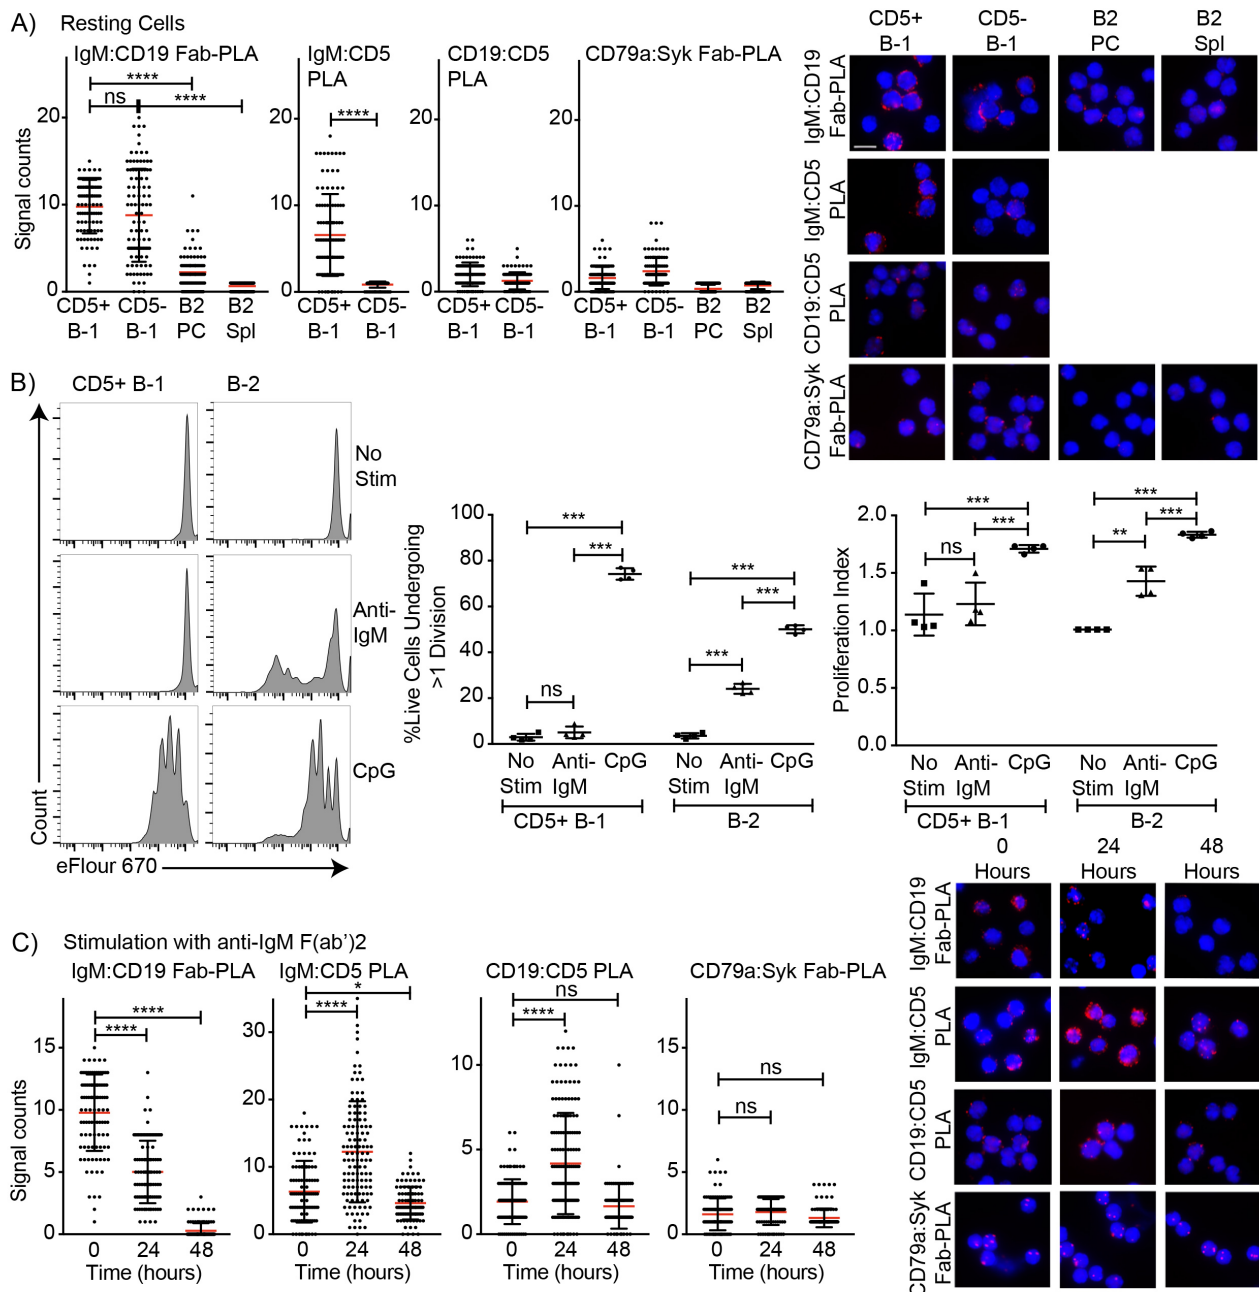

880

881 **Figure 6: Association of CD5 with IgM-BCR in resting B-1a cells is increased after BCR-**  
 882 **stimulation (A)** Indicated FACS-purified B cell subsets from the peritoneal cavity (PC) and spleen  
 883 (Spl) of C57BL/6 mice were analyzed by proximal ligation assay for the following interactions (left  
 884 to right): IgM:CD19, IgM:CD5, CD19:CD5 and CD79:Syk. Left panel shows summarizes data on  
 885 signal counts for 200 individual cells analyzed. Each symbol represents one cell, horizontal line  
 886 indicates mean signal count per cell. Right panel show representative fluorescent images. (B)  
 887 FACS-purified CD19<sup>hi</sup> CD23<sup>-</sup> CD5<sup>+</sup> CD43<sup>+</sup> B-1 cells from the peritoneal cavity and CD19<sup>+</sup>  
 888 CD23<sup>+</sup> splenic B-2 cells were labeled with efluor670 and then cultured in the absence (top) or  
 889 presence of 20 ug/ml anti-IgM (middle) or 10 ug/ml CpGs for 72h. Left panels show representative  
 890 histogram plots, middle panel shows the % cells in each culture having undergone at least one  
 891 cell division and right panel indicates the proliferation index (average number of proliferations  
 892 undergone per divided cell). (C) Summary of proximal ligation assay results of B-1 cells purified  
 893 as in (A) and then stimulated for indicated times with anti-IgM(Fab)<sub>2</sub>. Interactions of the following  
 894 proteins were analyzed on 200 cells per condition (left to right): IgM:CD19, IgM:CD5, CD19:CD5

895 and CD79: syk. Right panels shows representative fluorescent images from one experiment of at  
896 least two done. Values were compared using an unpaired Student's t test (\*=p<0.05, \*\*=p<0.005,  
897 \*\*\*=p<0.0005, \*\*\*\*=p<0.00005).  
898

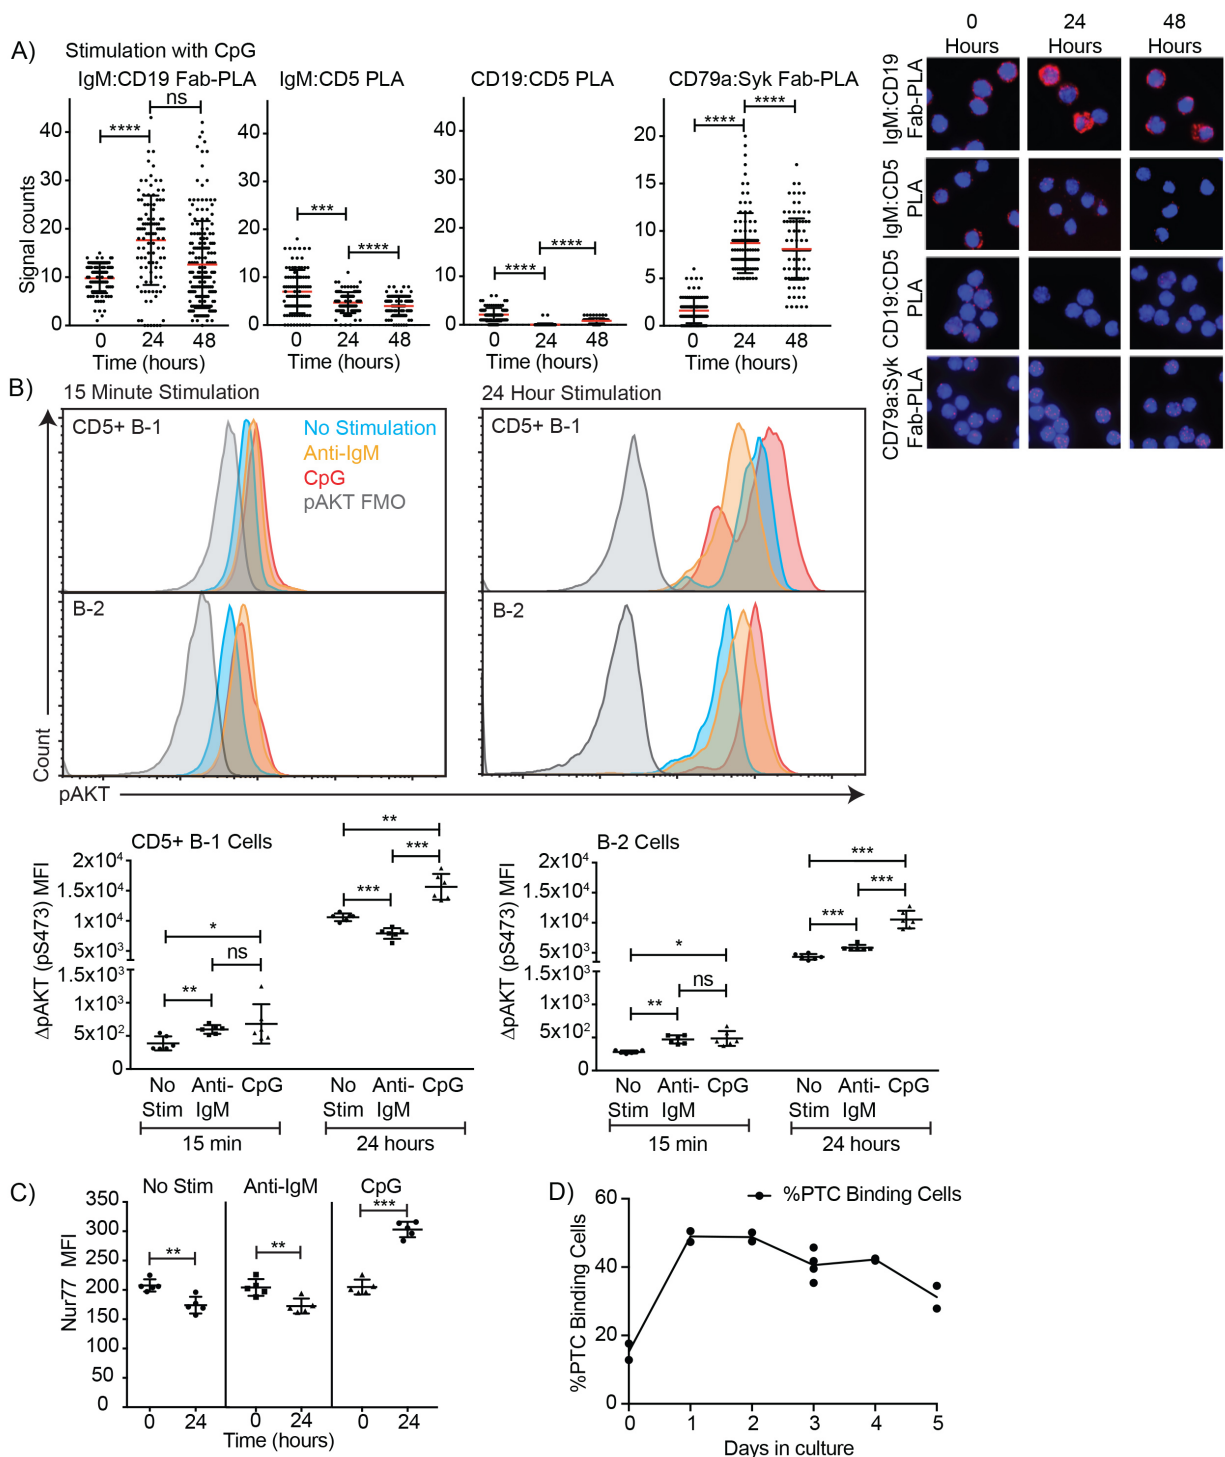

899  
900  
901  
902  
903  
904  
905  
906  
907  
908  
909  
910

**Figure 7 TLR-mediated stimulation of CD5+ B-1 cells alters the BCR-signalosome (A)** FACS-purified peritoneal cavity CD19<sup>hi</sup> CD23<sup>-</sup> CD43<sup>+</sup> CD5<sup>+</sup> B-1 and splenic CD19<sup>+</sup> CD23<sup>+</sup> CD43<sup>-</sup> CD5<sup>-</sup> B-2 cell of C57BL/6 mice were stimulated for the indicated times with TLR9-agonist ODN7909 prior to analysis by proximal ligation assay, probing for the following interactions (left to right): IgM:CD19, IgM:CD5, CD19:CD5 and CD79:Syk. Left panel summarizes data on signal counts for 200 individual cells analyzed. Each symbol represents one cell, horizontal line indicates mean signal count per cell. Right panel show representative fluorescent images. **(B)** Analysis of the phosphorylation status of Akt by probing for Akt pS473 by flow cytometry. Top panels show representative histogram plots, bottom summarizes the results. **(C)** Mean fluorescence intensity  $\pm$  SD of staining for the immediate early activation factor Nur77, in CD5<sup>+</sup> B-1 cells isolated as described in (A) and cultured for up to 2 days in the absence and presence of the indicated stimuli.

911 (D) Shown are % frequencies of live PtC-binding B-1 cells among live FACS-purified CD5+  
912 peritoneal cavity B-1 cells cultured with LPS stimulation for the indicated times, as assessed by  
913 flow cytometry. Each symbol represents results obtained from one culture well. Results are  
914 representative from experiments conducted at least twice with multiple repeats done per  
915 experiment (n=2-5). Results in D are combined from two independent experiments. Values were  
916 compared using an unpaired Student's t test (\*=p<0.05, \*\*=p<0.005, \*\*\*=p<0.0005).  
917

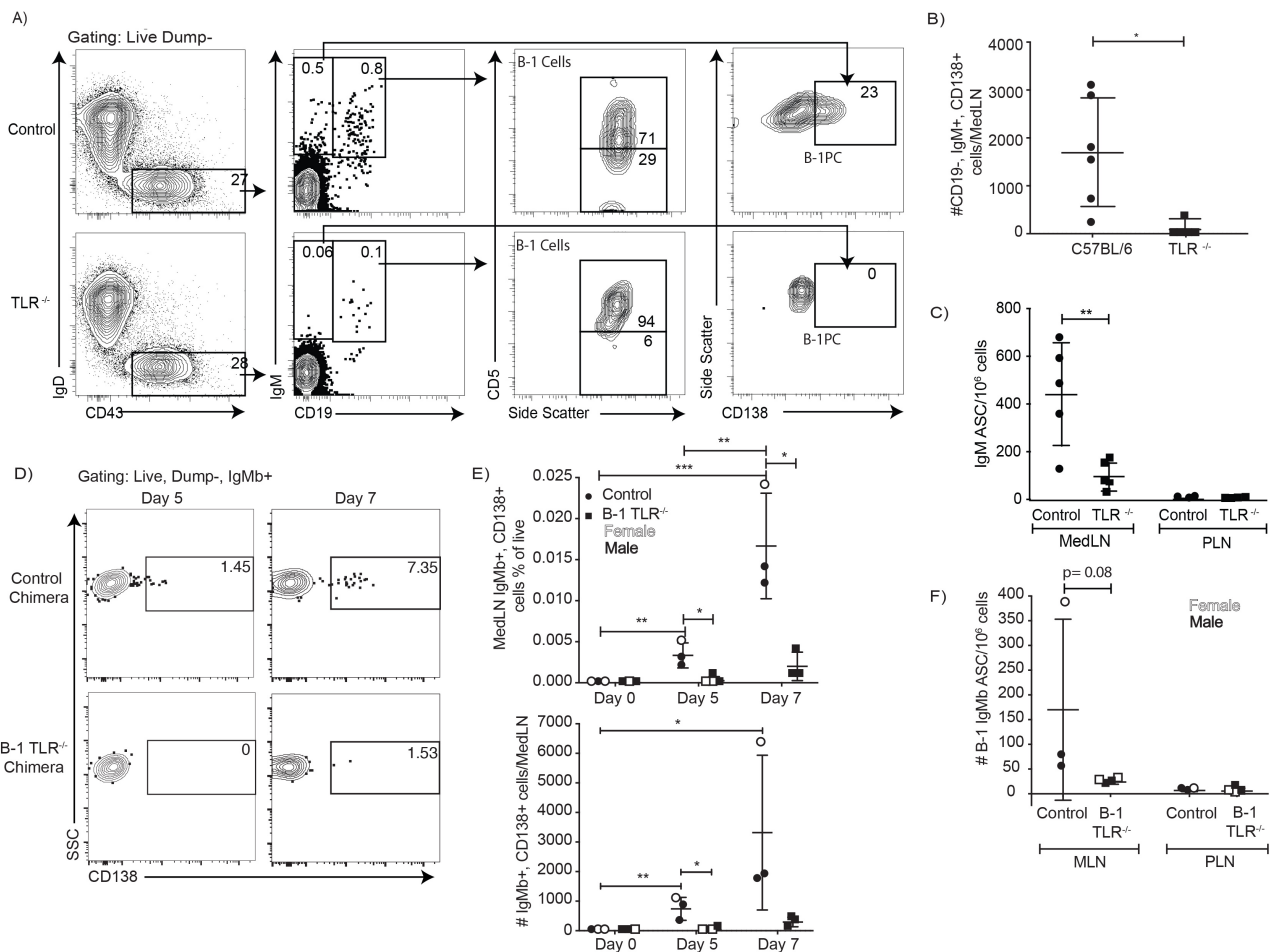

918  
919  
920  
921  
922  
923  
924  
925  
926  
927  
928  
929  
930  
931  
932  
933  
934  
935

**Figure 8: TLR-mediated stimulation is required for maximal IgM responses to influenza virus infection** (A) C57BL/6 (n = 5) and congenic total TLR<sup>-/-</sup> mice (n =5; lacking TLR2, TLR4 and Unc93) were infected with influenza A/Puerto Rico/8/34 for 5 days. Shown are representative FACS plots from control C57BL/6 (top) and TLR<sup>-/-</sup> (bottom) mice FACS analysis of MedLN for the presence of B-1 and B-1PC. (B) Total number of CD19<sup>+</sup> IgM<sup>+</sup> CD138<sup>+</sup> plasmablasts as assessed by FACS and (C) IgM-secreting cells per MedLN (or PLN as controls) as assessed by ELISPOT of infected mice. (D-F) Similar analysis as for A-C but using allotype chimeras generated with wild type recipients and B-1 cells from either C57BL/6 or TLR<sup>-/-</sup> mice. (D) Representative FACS analysis of CD138<sup>+</sup> B-1PC pre-gated for live, dump-, B-1 donor (IgMb<sup>+</sup>) cells in MedLN on days 5 and 7 after influenza infection. (E) Mean ± SD of data summarized from analysis shown in D. (F) Mean ± SD of B-1 IgM-ASC in MedLN on day 7 after infection, as assessed by ELISPOT. Each symbol represents results from one mouse with female mice shown as open symbols, males as closed symbols. Results are combined from two independent experiments. Values were compared using an unpaired Student's t test (\*=p<0.05, \*\*=p<0.005, n.s. not significant).
